# Supplementary material for: Synthesis and Antiproliferative Activity of Novel Heterocyclic Glycyrrhetinic Acid Derivatives
Source: PubMed Central journal article supplement (PMC6412232; doi:10.3390/molecules24040766), 2019-02-20

# Supplementary information

## Synthesis and anticancer activity of novel heterocyclic glycyrrhetic acid derivatives

**Daniela P. S. Alho**<sup>1,2</sup>, **Jorge A. R. Salvador**<sup>1,2,\*</sup>, **Marta Cascante**<sup>3</sup> and **Silvia Marín**<sup>3,\*</sup>

<sup>1</sup>Laboratory of Pharmaceutical Chemistry, Faculty of Pharmacy, University of Coimbra, 3000-548 Coimbra, Portugal.

<sup>2</sup>Center of Neuroscience and Cell Biology, Coimbra, Portugal.

<sup>3</sup>Department of Biochemistry and Molecular Biomedicine, Faculty of Biology, University of Barcelona, Diagonal 643, 08028 Barcelona.

## Table of contents

|                                                                                       |    |
|---------------------------------------------------------------------------------------|----|
| 1. NMR data for compound 8.....                                                       | 4  |
| 1.1. <sup>1</sup> H NMR spectrum for compound 8 recorded in CDCl <sub>3</sub> .....   | 4  |
| 1.2. <sup>13</sup> C NMR spectrum for compound 8 recorded in CDCl <sub>3</sub> .....  | 5  |
| 1.3. DEPT-135 spectrum for compound 8 recorded in CDCl <sub>3</sub> .....             | 6  |
| 2. NMR data for compound 9.....                                                       | 7  |
| 2.1. <sup>1</sup> H NMR spectrum for compound 9 recorded in CDCl <sub>3</sub> .....   | 7  |
| 2.2. <sup>13</sup> C NMR spectrum for compound 9 recorded in CDCl <sub>3</sub> .....  | 8  |
| 2.3. DEPT-135 spectrum for compound 8 recorded in CDCl <sub>3</sub> .....             | 9  |
| 3. NMR data for compound 10.....                                                      | 10 |
| 3.1. <sup>1</sup> H NMR spectrum for compound 10 recorded in CDCl <sub>3</sub> .....  | 10 |
| 3.2. <sup>13</sup> C NMR spectrum for compound 10 recorded in CDCl <sub>3</sub> ..... | 11 |
| 3.3. DEPT-135 spectrum for compound 10 recorded in CDCl <sub>3</sub> .....            | 12 |
| 4. NMR data for compound 12.....                                                      | 13 |
| 4.1. <sup>1</sup> H NMR spectrum for compound 12 recorded in CDCl <sub>3</sub> .....  | 13 |
| 4.2. <sup>13</sup> C NMR spectrum for compound 12 recorded in CDCl <sub>3</sub> ..... | 14 |
| 4.3. DEPT-135 spectrum for compound 12 recorded in CDCl <sub>3</sub> .....            | 15 |
| 4.4. HMQC NMR spectrum for compound 12 recorded in CDCl <sub>3</sub> .....            | 16 |
| 4.5. HMBC NMR spectrum for compound 12 recorded in CDCl <sub>3</sub> .....            | 17 |
| 5. NMR data for compound 14.....                                                      | 18 |
| 5.1. <sup>1</sup> H NMR spectrum for compound 14 recorded in CDCl <sub>3</sub> .....  | 18 |
| 5.2. <sup>13</sup> C NMR spectrum for compound 14 recorded in CDCl <sub>3</sub> ..... | 19 |
| 5.3. DEPT-135 spectrum for compound 14 recorded in CDCl <sub>3</sub> .....            | 20 |
| 6. NMR data for compound 16.....                                                      | 21 |
| 6.1. <sup>1</sup> H NMR spectrum for compound 16 recorded in CDCl <sub>3</sub> .....  | 21 |
| 6.2. <sup>13</sup> C NMR spectrum for compound 16 recorded in CDCl <sub>3</sub> ..... | 22 |
| 6.3. DEPT-135 spectrum for compound 16 recorded in CDCl <sub>3</sub> .....            | 23 |
| 7. NMR data for compound 17.....                                                      | 24 |
| 7.1. <sup>1</sup> H NMR spectrum for compound 17 recorded in CDCl <sub>3</sub> .....  | 24 |
| 7.2. <sup>13</sup> C NMR spectrum for compound 17 recorded in CDCl <sub>3</sub> ..... | 25 |
| 7.3. DEPT-135 spectrum for compound 17 recorded in CDCl <sub>3</sub> .....            | 26 |
| 7.4. HMQC NMR spectrum for compound 17 recorded in CDCl <sub>3</sub> .....            | 27 |
| 7.5. HMCB NMR spectrum for compound 17 in CDCl <sub>3</sub> .....                     | 28 |
| 8. NMR data for compound 19.....                                                      | 29 |
| 8.1. <sup>1</sup> H NMR spectrum for compound 19 recorded in CDCl <sub>3</sub> .....  | 29 |
| 8.2. <sup>13</sup> C NMR spectrum for compound 19 recorded in CDCl <sub>3</sub> ..... | 30 |

|       |                                                                                  |    |
|-------|----------------------------------------------------------------------------------|----|
| 8.3.  | DEPT-135 spectrum for compound 19 recorded in CDCl <sub>3</sub> .....            | 31 |
| 9.    | NMR data for compound 20.....                                                    | 32 |
| 9.1.  | <sup>1</sup> H NMR spectrum for compound 20 recorded in CDCl <sub>3</sub> .....  | 32 |
| 9.2.  | <sup>13</sup> C NMR spectrum for compound 20 recorded in CDCl <sub>3</sub> ..... | 33 |
| 9.3.  | DEPT-135 spectrum for compound 20 recorded in CDCl <sub>3</sub> .....            | 34 |
| 10.   | NMR data for compound 21.....                                                    | 35 |
| 10.1. | <sup>1</sup> H NMR spectrum for compound 21 recorded in CDCl <sub>3</sub> .....  | 35 |
| 10.2. | <sup>13</sup> C NMR spectrum for compound 21 recorded in CDCl <sub>3</sub> ..... | 36 |
| 10.3. | DEPT-135 spectrum for compound 21 recorded in CDCl <sub>3</sub> .....            | 37 |
| 11.   | NMR data for compound 22.....                                                    | 38 |
| 11.1. | <sup>1</sup> H NMR spectrum for compound 22 recorded in CDCl <sub>3</sub> .....  | 38 |
| 11.2. | <sup>13</sup> C NMR spectrum for compound 22 recorded in CDCl <sub>3</sub> ..... | 39 |
| 11.3. | DEPT-135 spectrum for compound 22 recorded in CDCl <sub>3</sub> .....            | 40 |
| 11.4. | HMQC NMR spectrum for compound 22 recorded in CDCl <sub>3</sub> .....            | 41 |
| 11.5. | HMBC NMR spectrum for compound 22 recorded in CDCl <sub>3</sub> .....            | 42 |

## 1. NMR data for compound 8

1.1.  $^1\text{H}$  NMR spectrum for compound 8 recorded in  $\text{CDCl}_3$

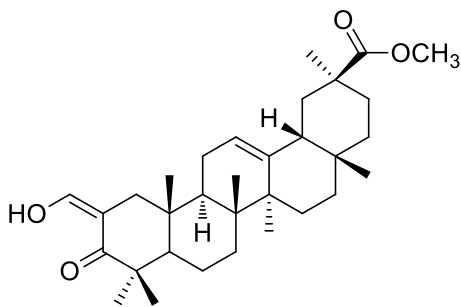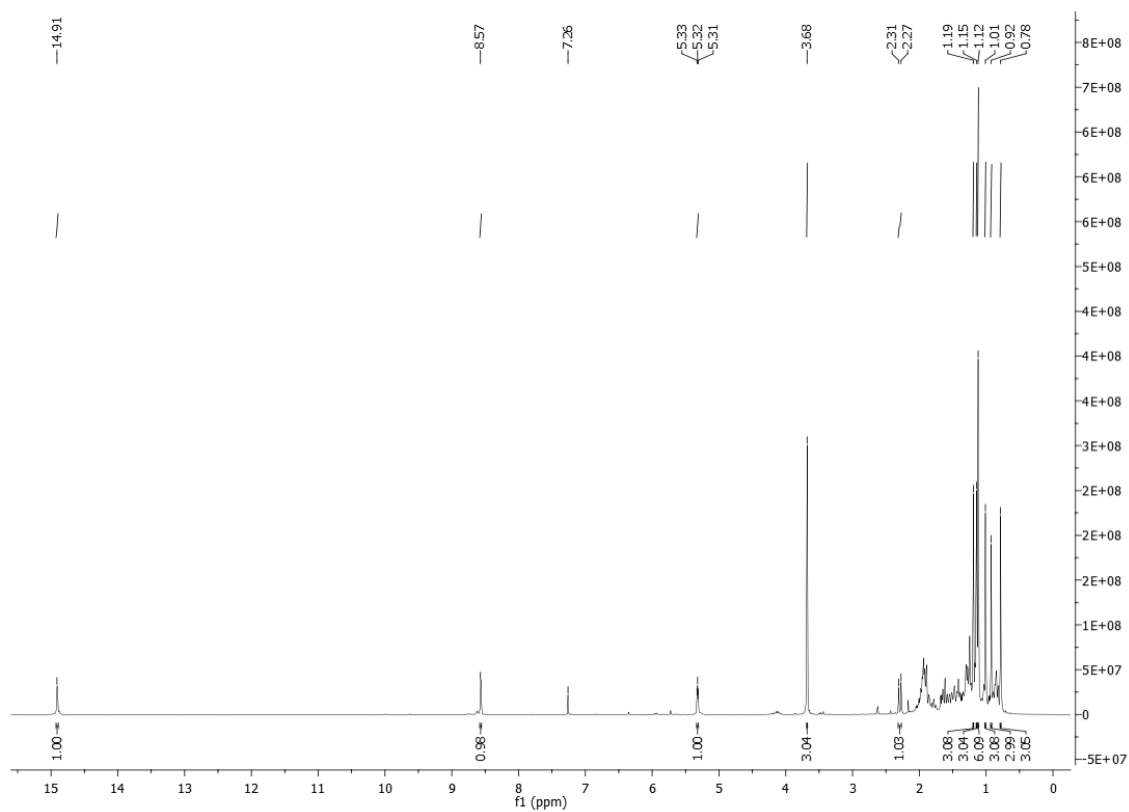

1.2.  $^{13}\text{C}$  NMR spectrum for compound 8 recorded in  $\text{CDCl}_3$

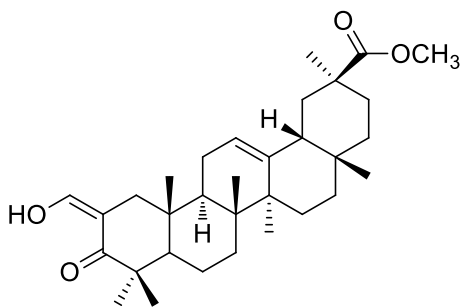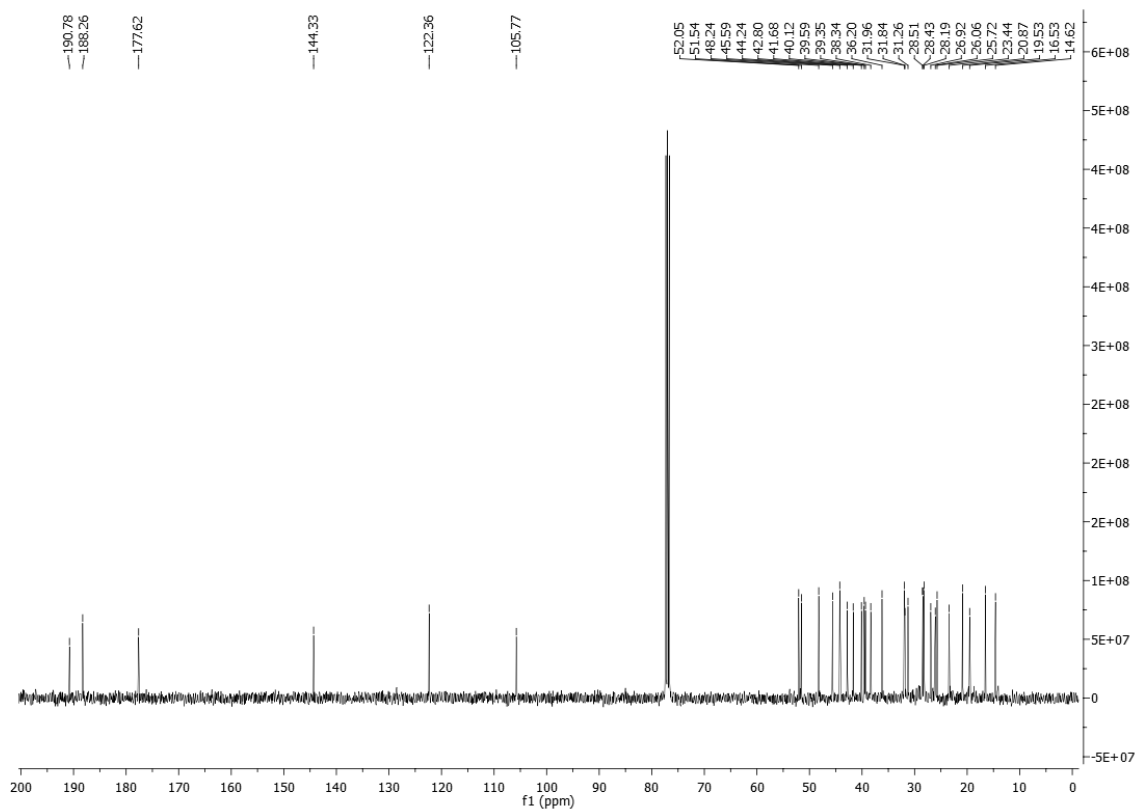

1.3. DEPT-135 spectrum for compound 8 recorded in CDCl<sub>3</sub>

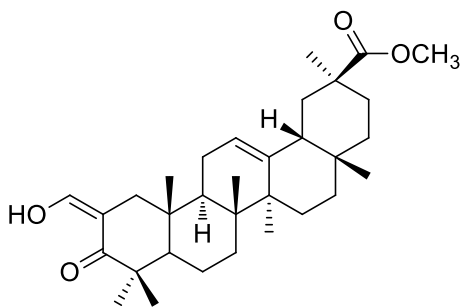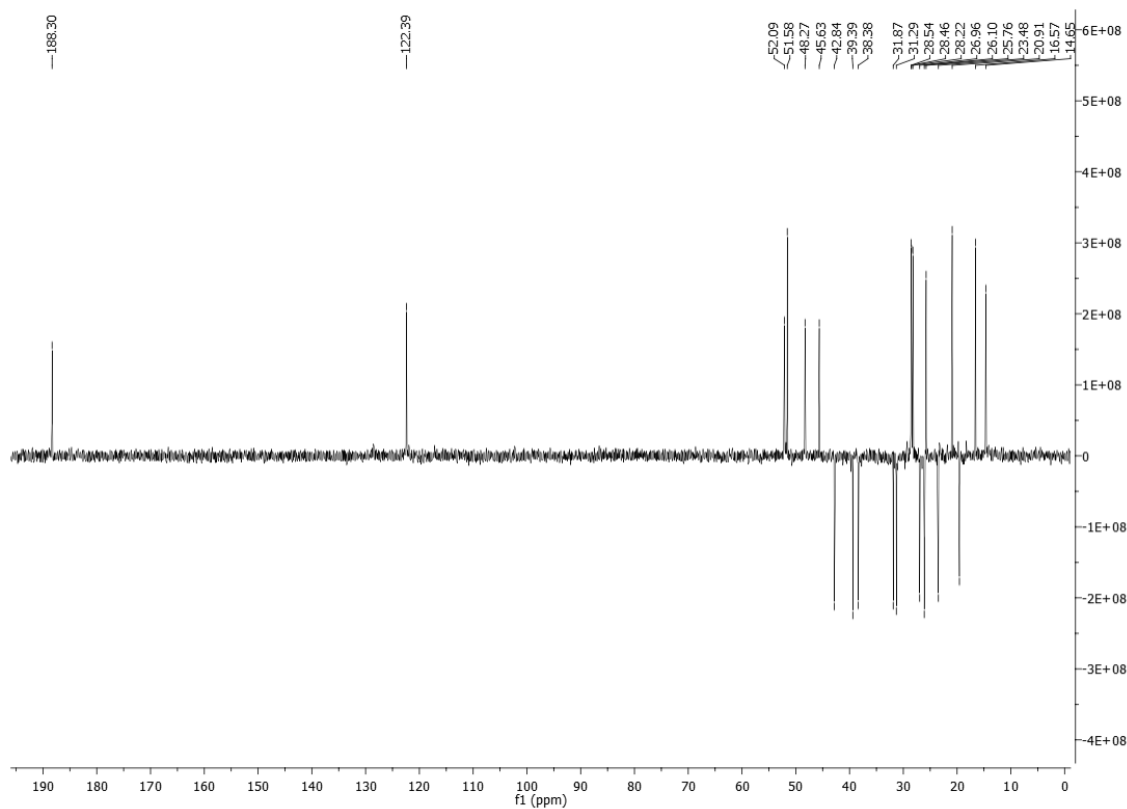

## 2. NMR data for compound 9

### 2.1. $^1\text{H}$ NMR spectrum for compound 9 recorded in $\text{CDCl}_3$

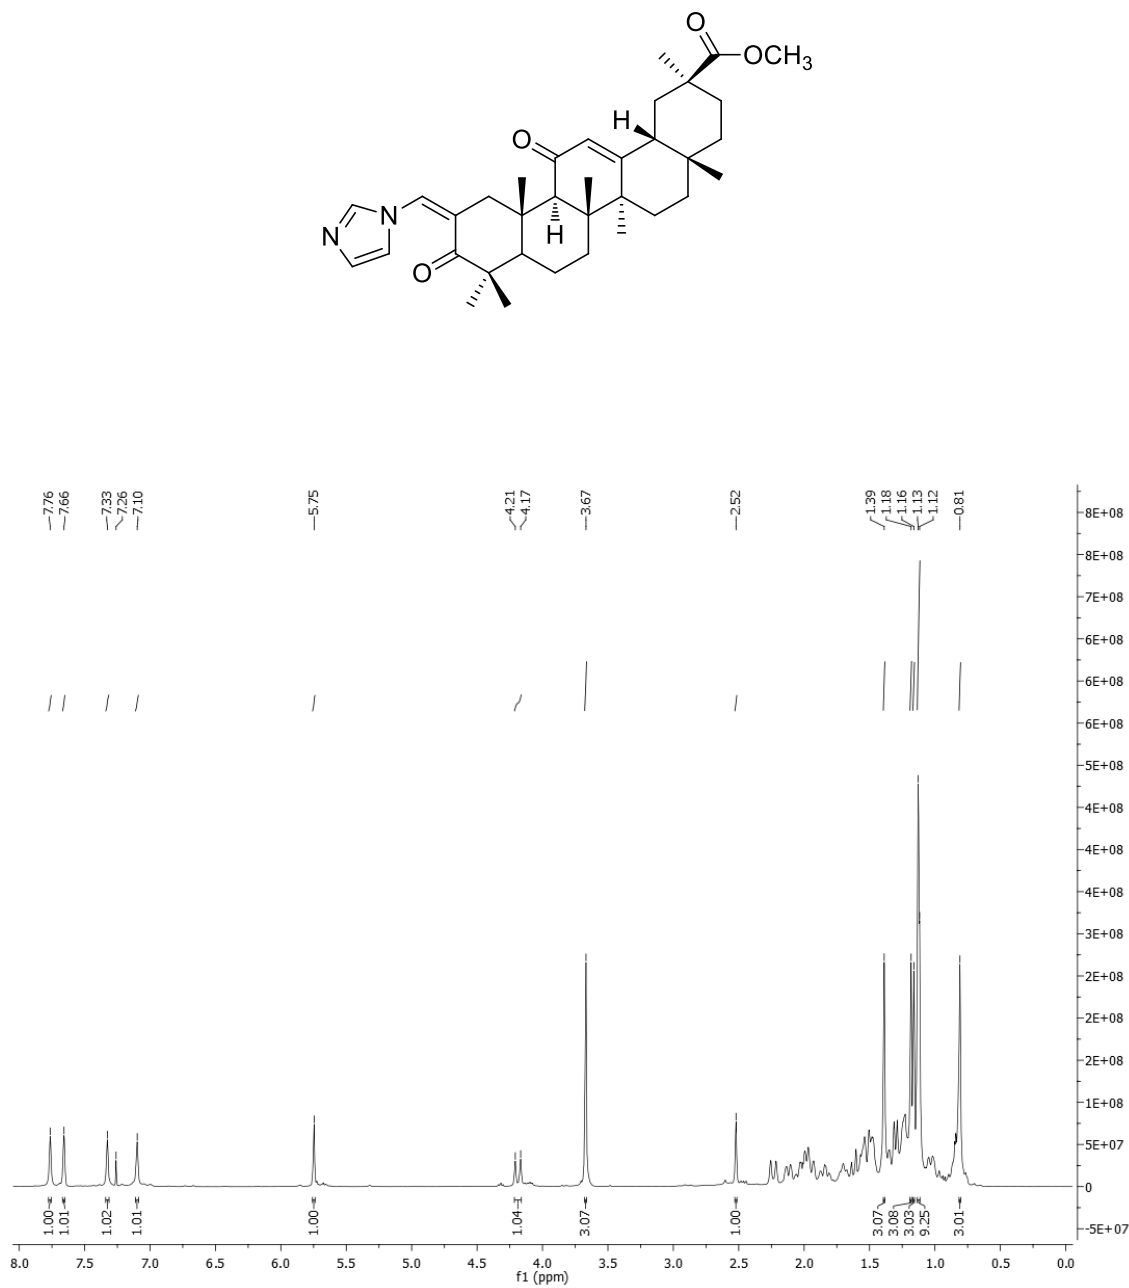

2.2.  $^{13}\text{C}$  NMR spectrum for compound 9 recorded in  $\text{CDCl}_3$

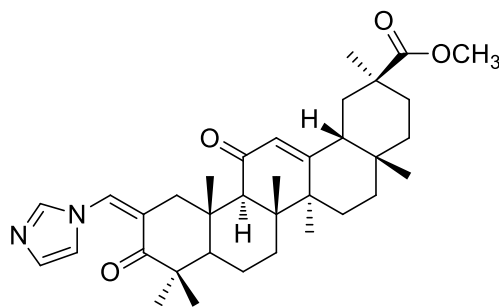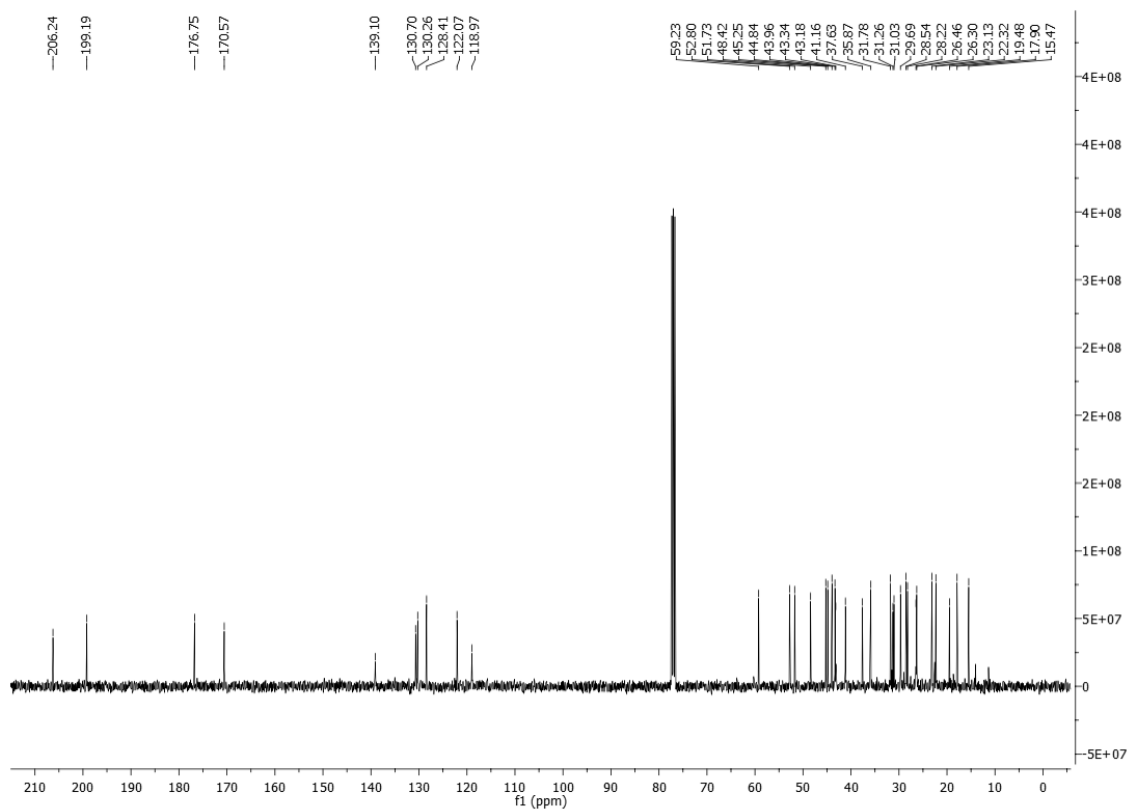



2.3. DEPT-135 spectrum for compound 9 recorded in CDCl<sub>3</sub>

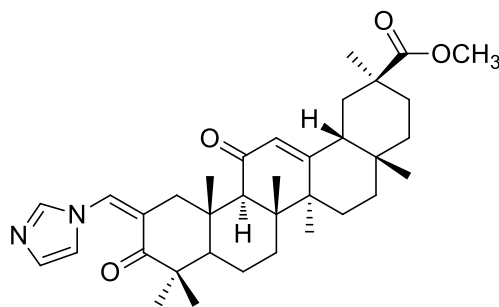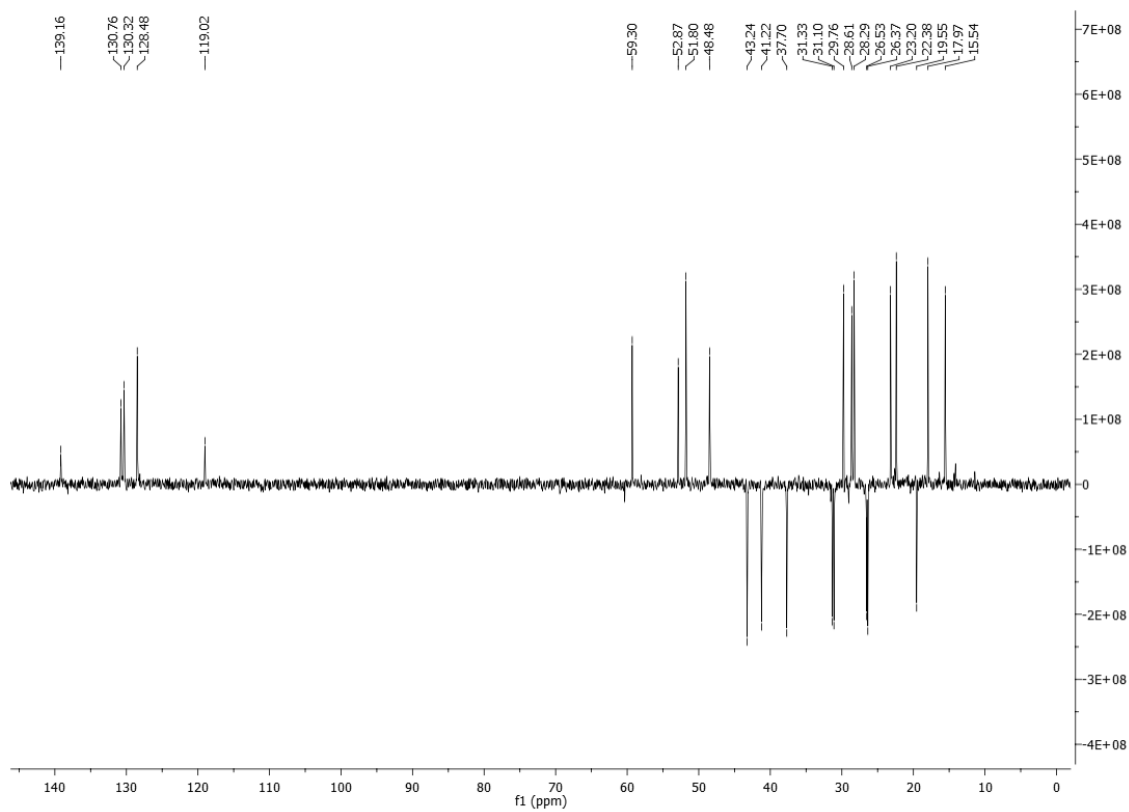

### 3. NMR data for compound 10

3.1.  $^1\text{H}$  NMR spectrum for compound 10 recorded in  $\text{CDCl}_3$

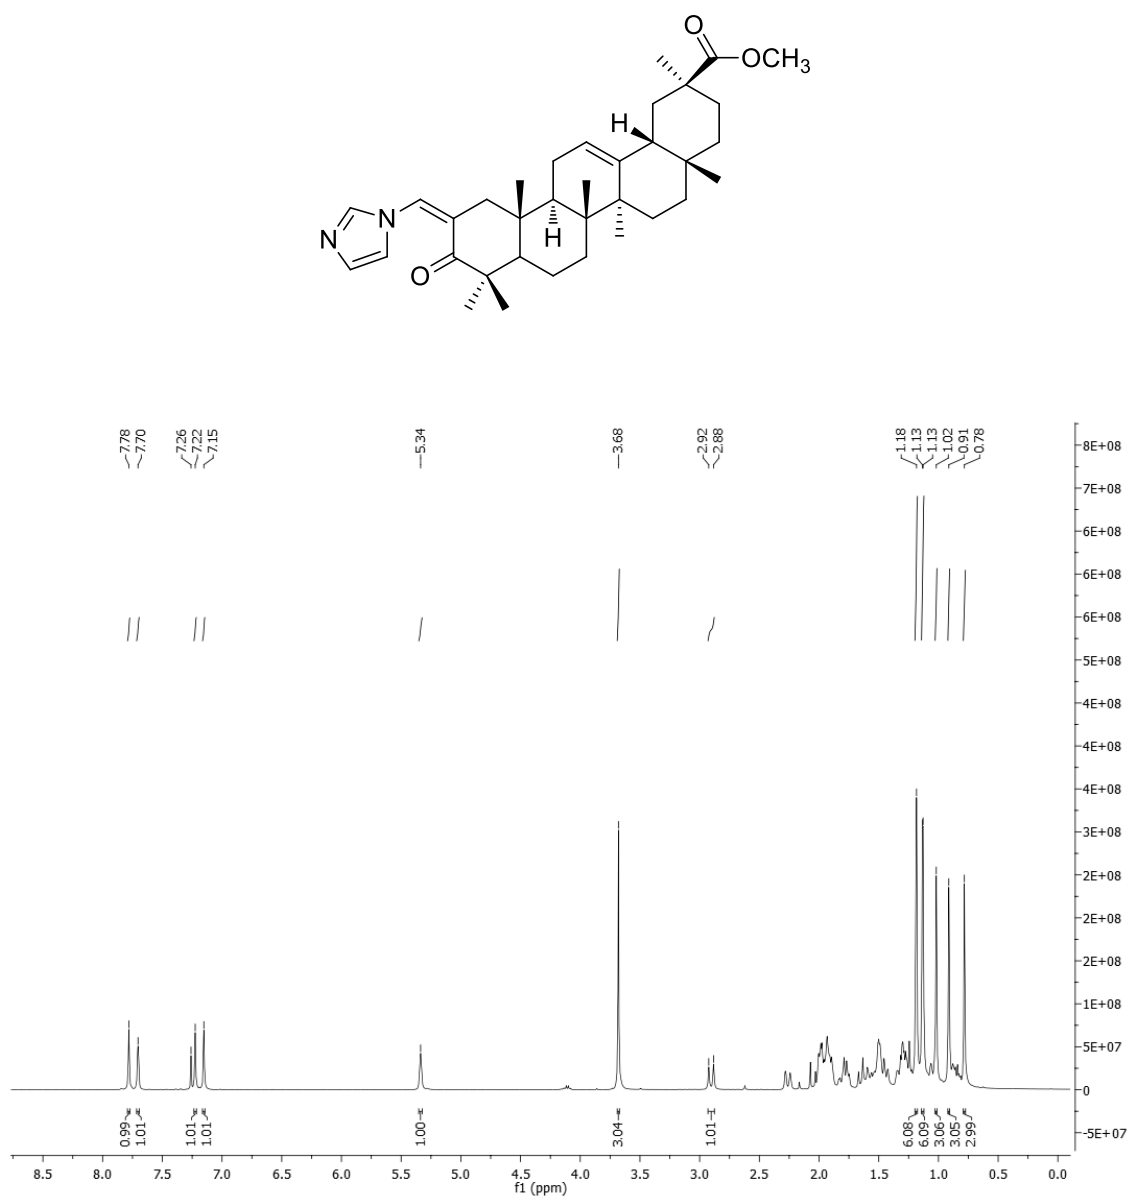

3.2.  $^{13}\text{C}$  NMR spectrum for compound 10 recorded in  $\text{CDCl}_3$

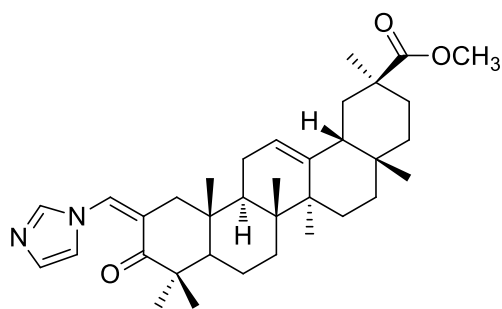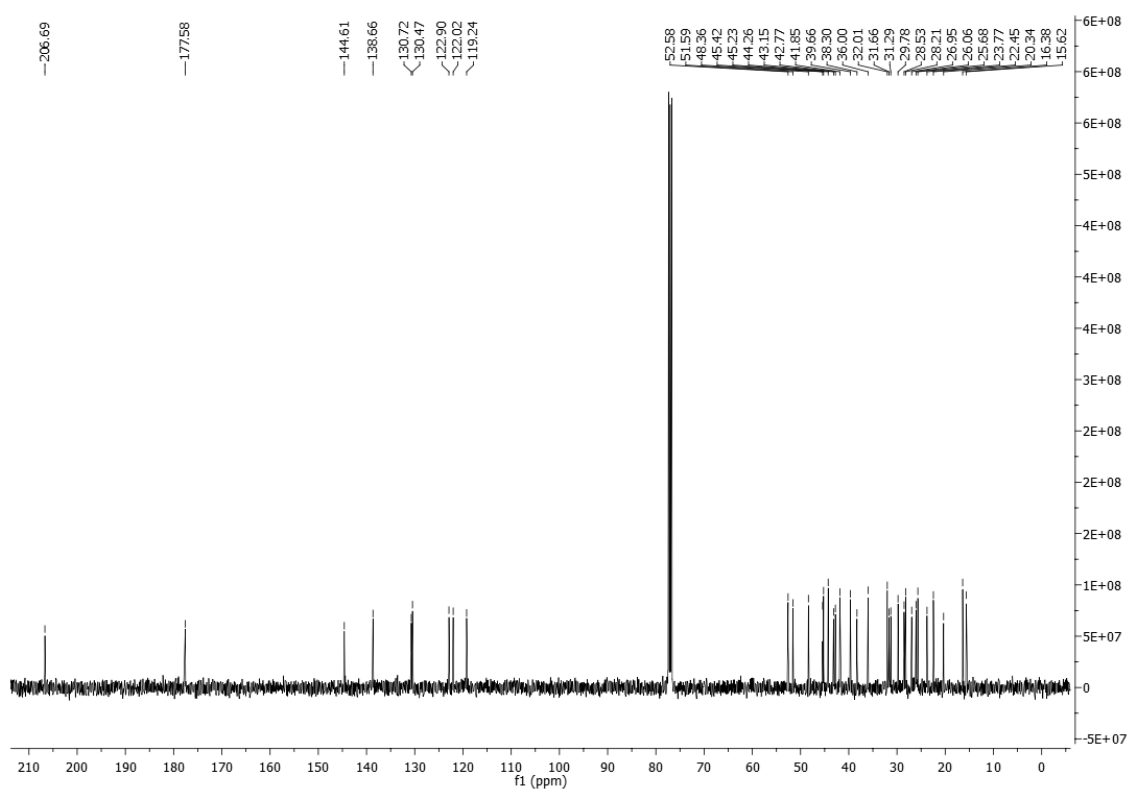

3.3. DEPT-135 spectrum for compound 10 recorded in CDCl<sub>3</sub>

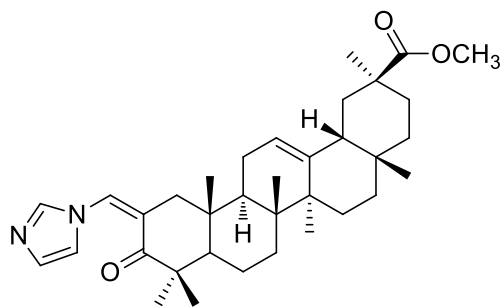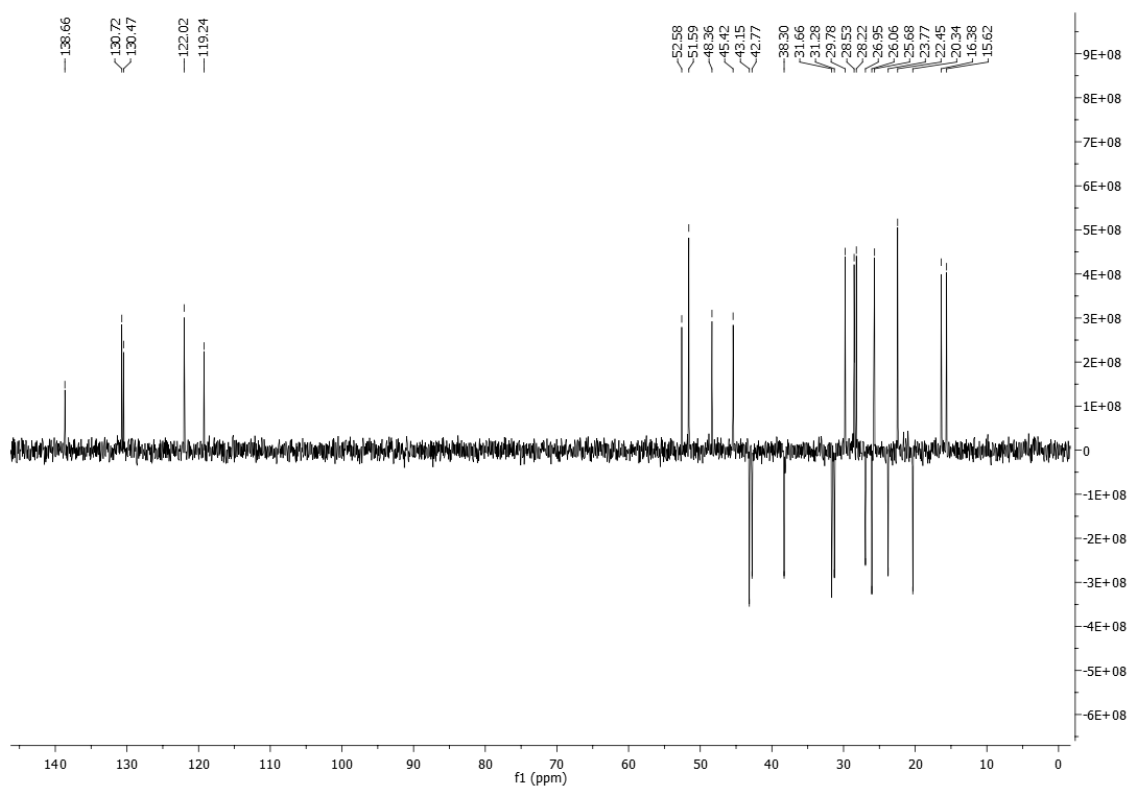

## 4. NMR data for compound 12

### 4.1. $^1\text{H}$ NMR spectrum for compound 12 recorded in $\text{CDCl}_3$

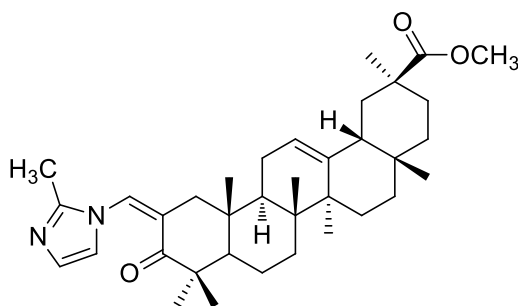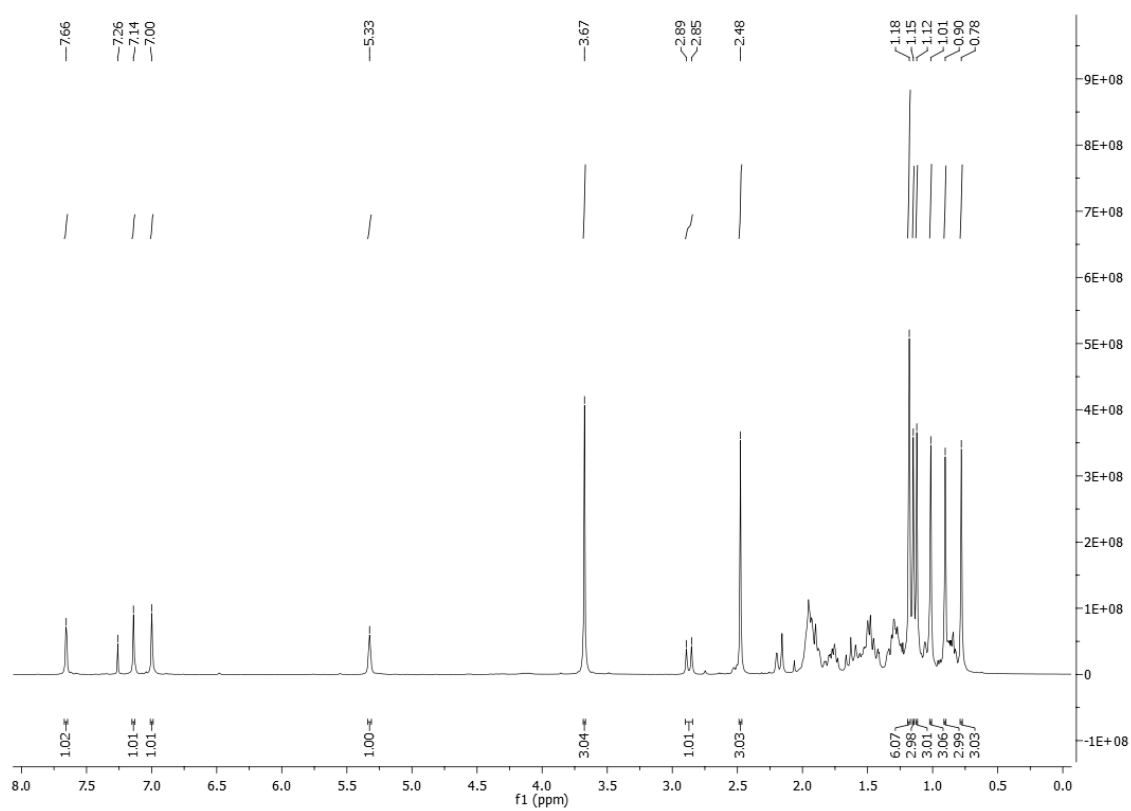

4.2.  $^{13}\text{C}$  NMR spectrum for compound 12 recorded in  $\text{CDCl}_3$

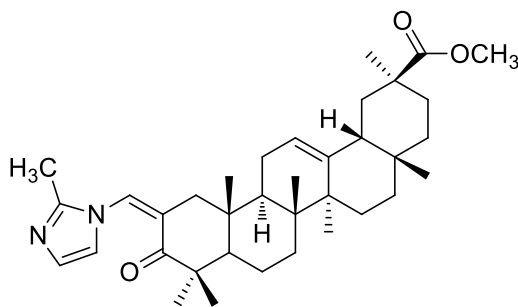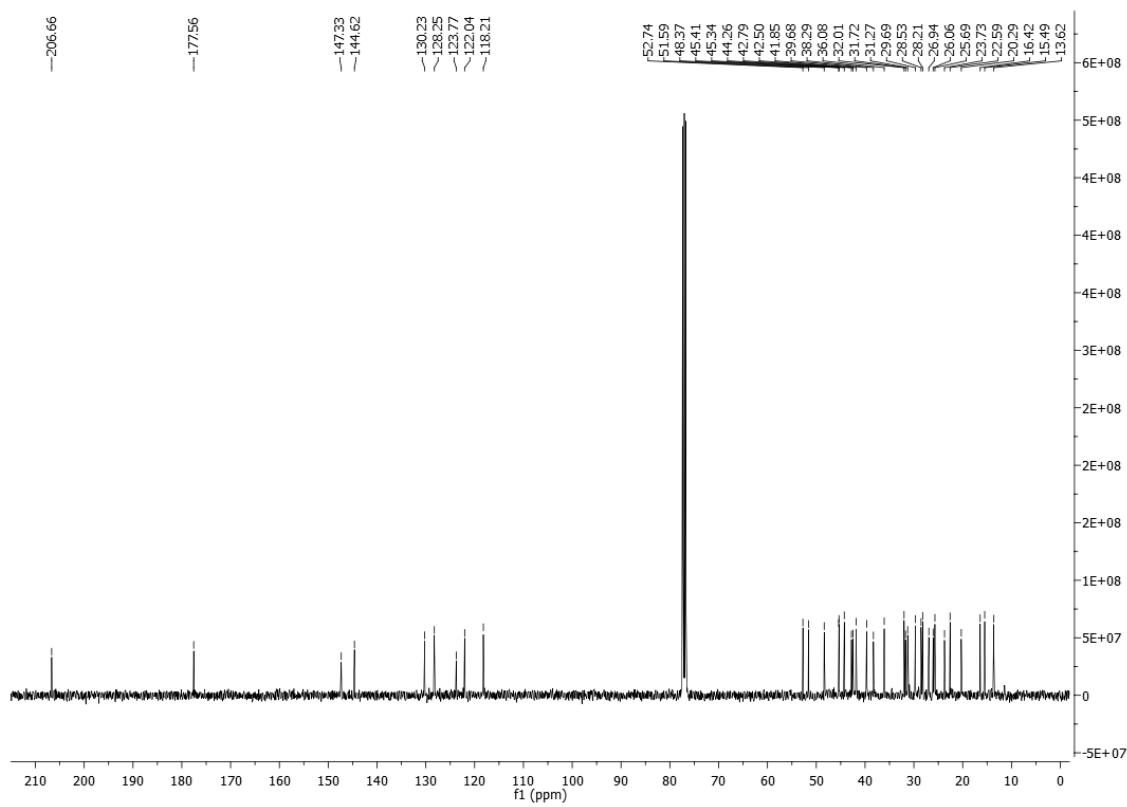

4.3. DEPT-135 spectrum for compound 12 recorded in CDCl<sub>3</sub>

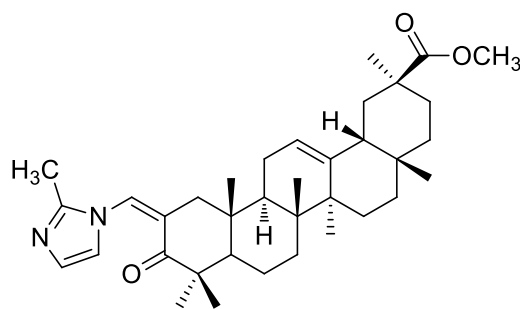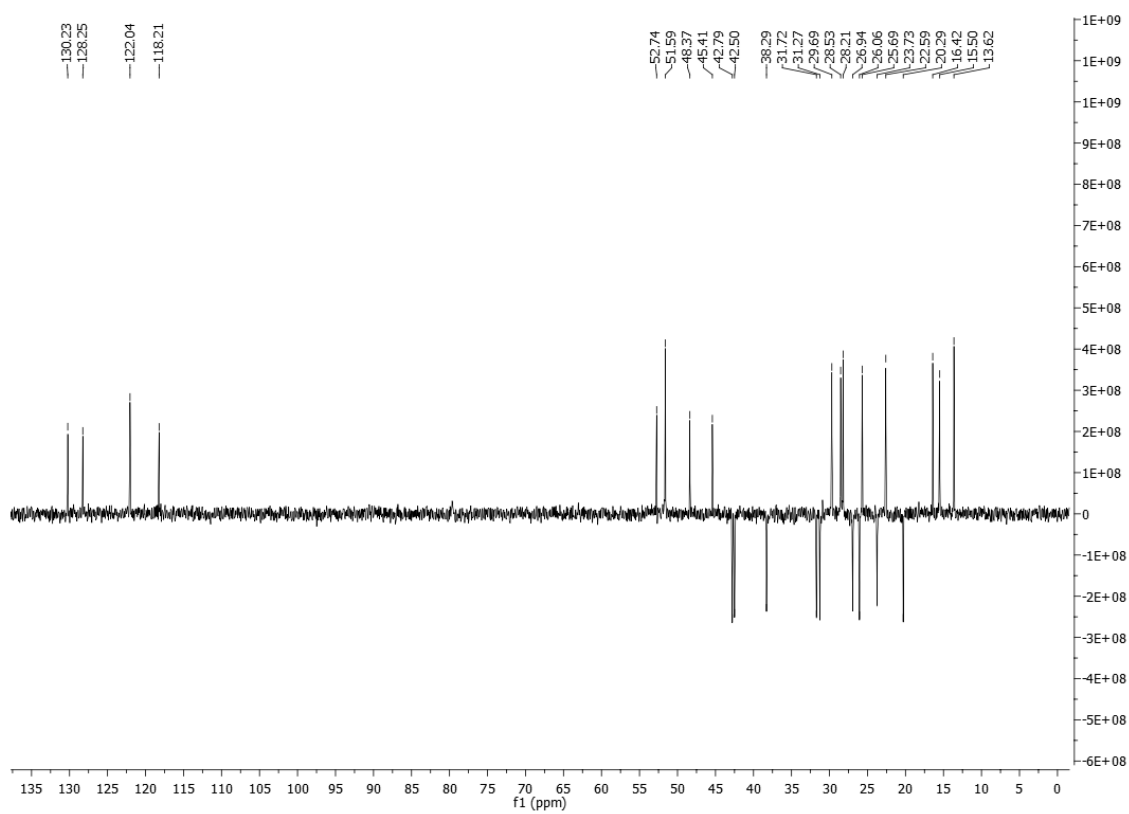

4.4. HMQC NMR spectrum for compound 12 recorded in CDCl<sub>3</sub>

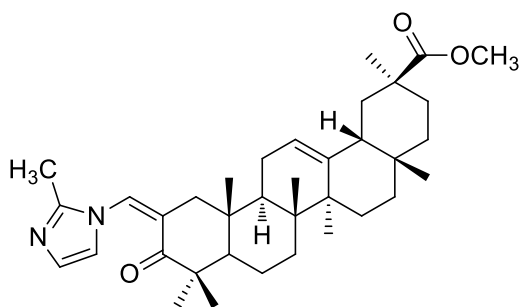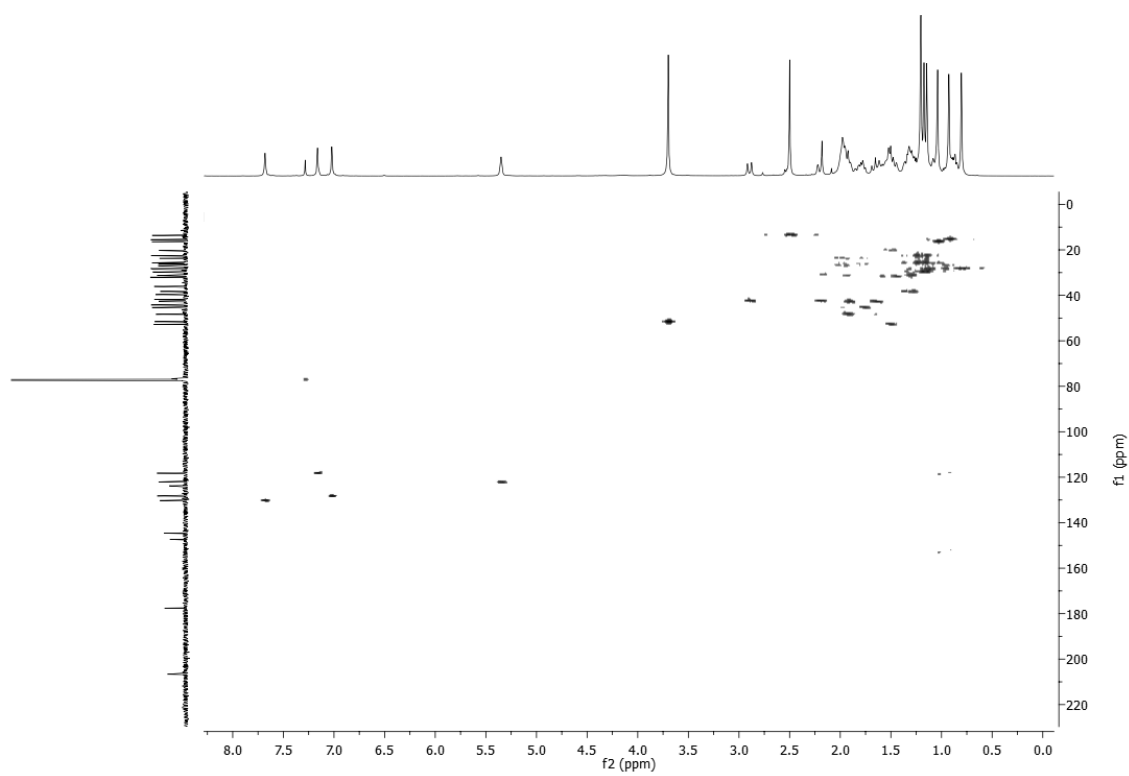



4.5. HMBC NMR spectrum for compound 12 recorded in CDCl<sub>3</sub>

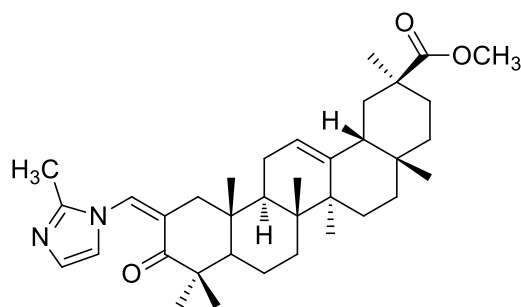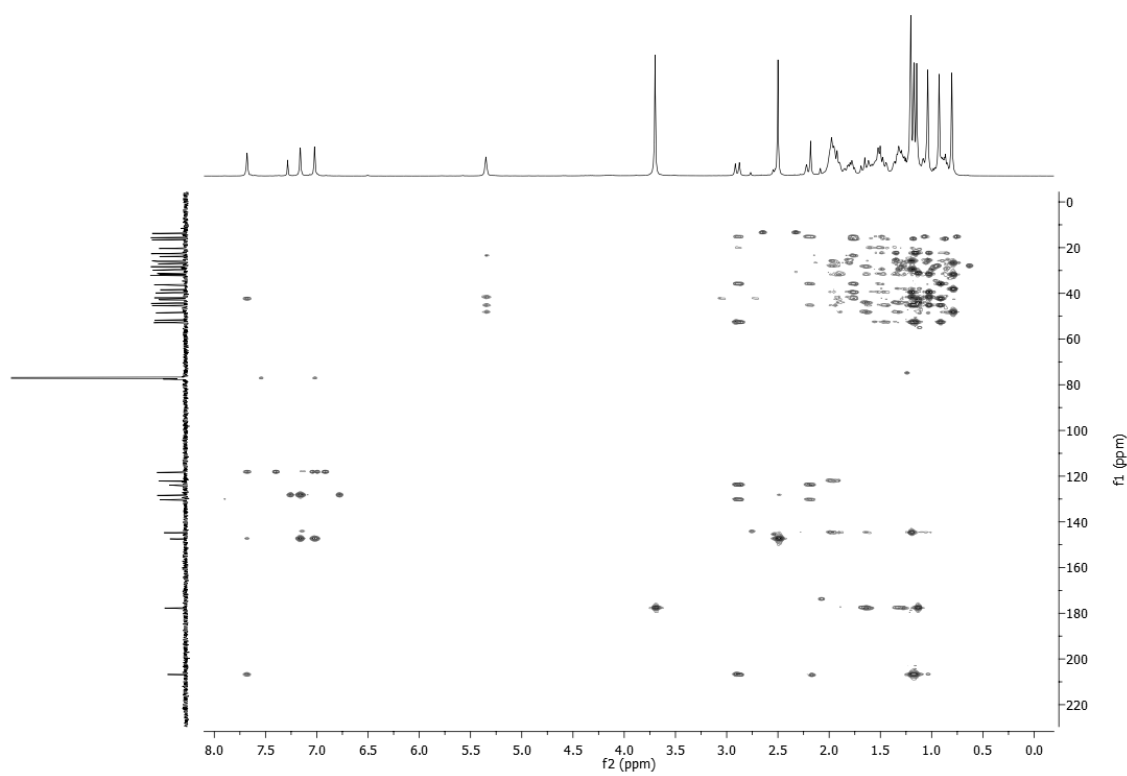

## 5. NMR data for compound 14

5.1.  $^1\text{H}$  NMR spectrum for compound 14 recorded in  $\text{CDCl}_3$

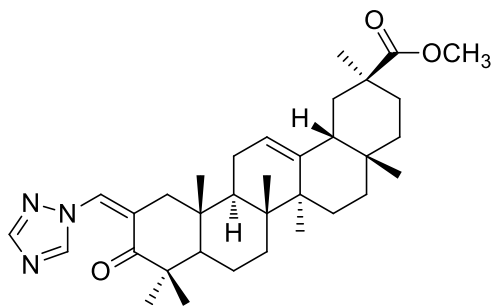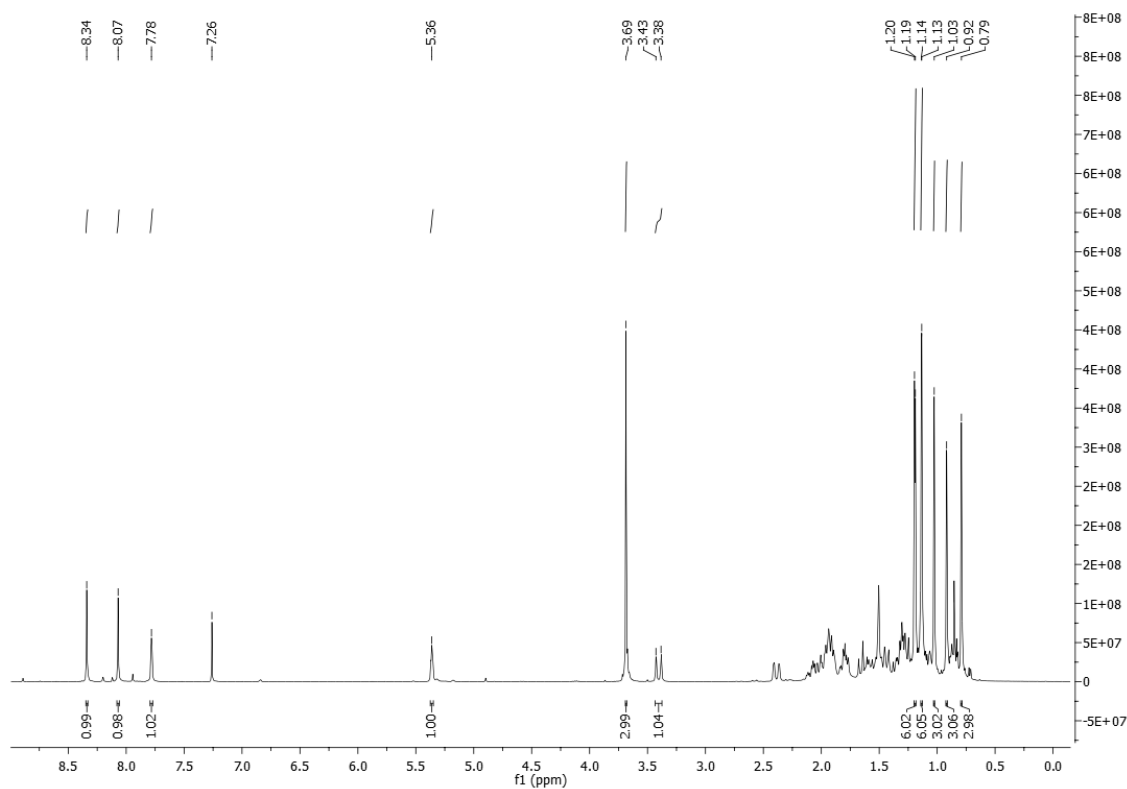

5.2.  $^{13}\text{C}$  NMR spectrum for compound 14 recorded in  $\text{CDCl}_3$

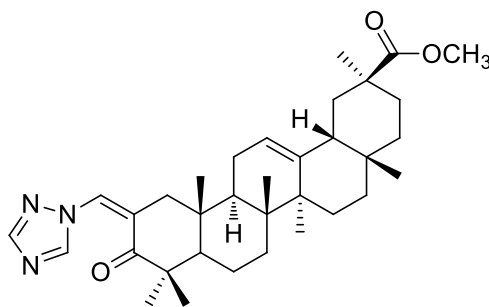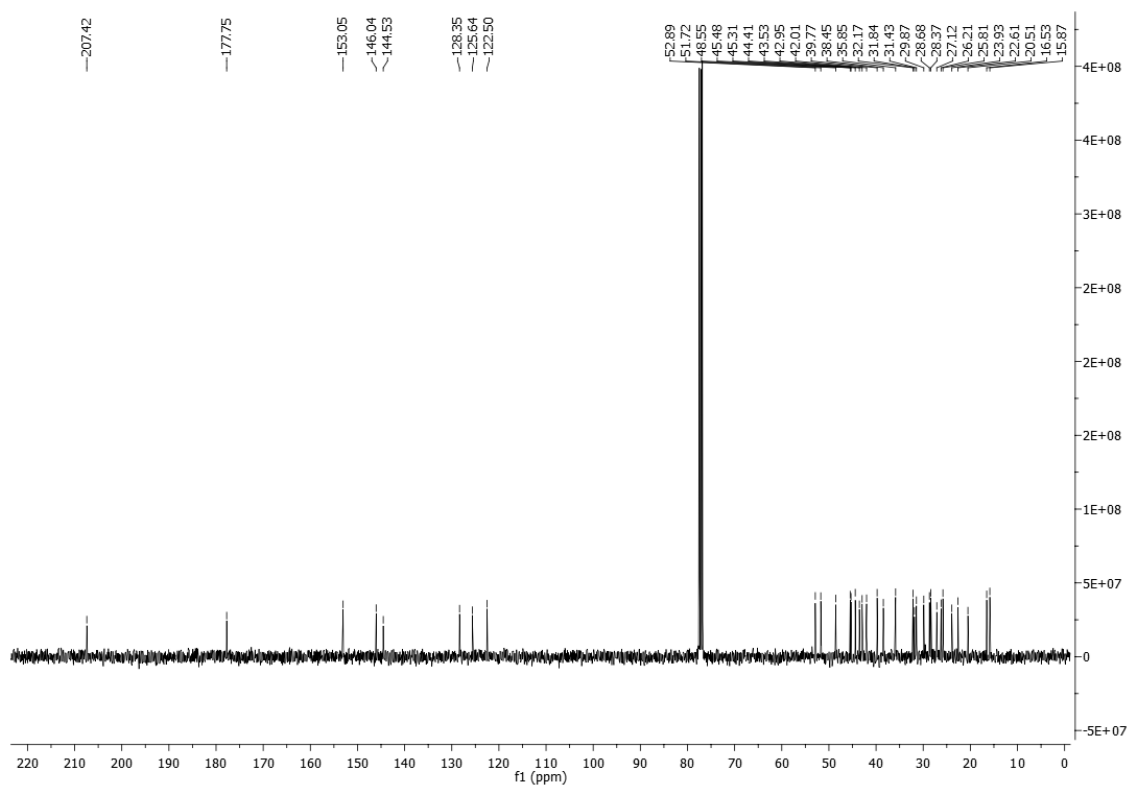

5.3. DEPT-135 spectrum for compound 14 recorded in CDCl<sub>3</sub>

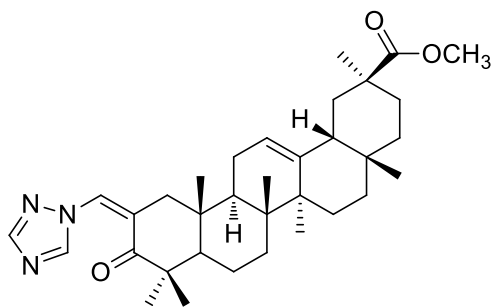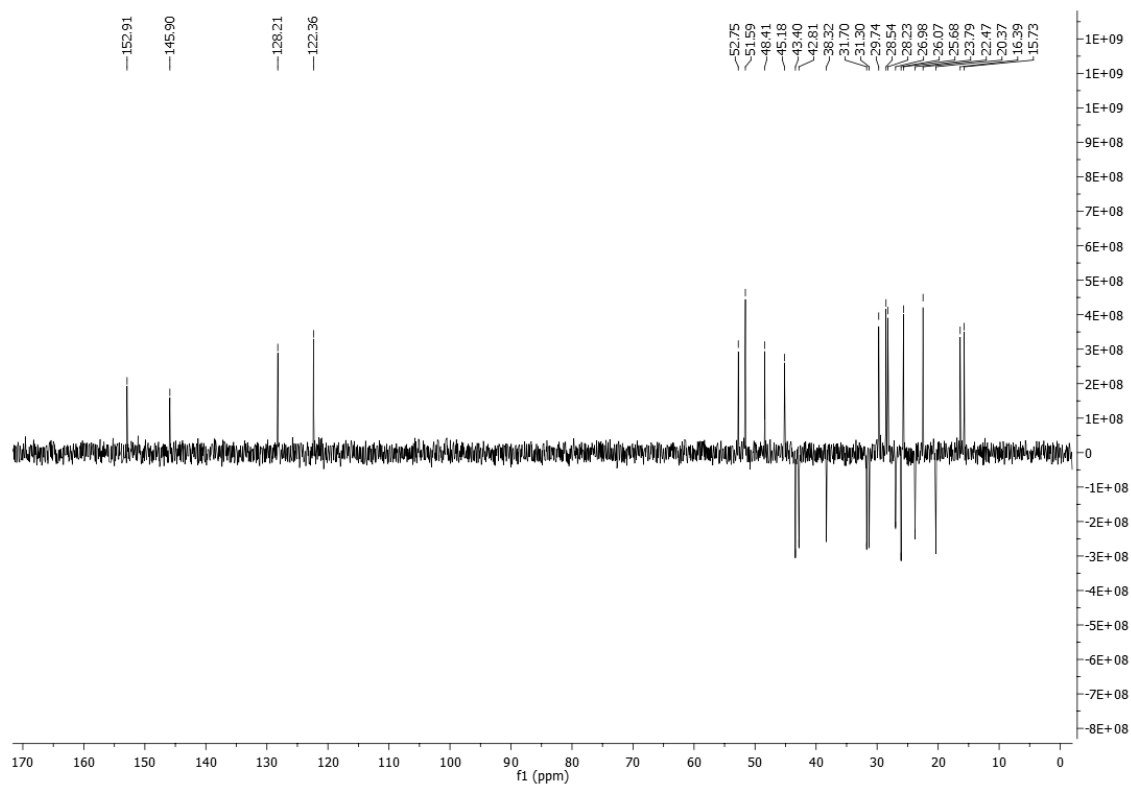

## 6. NMR data for compound 16

6.1.  $^1\text{H}$  NMR spectrum for compound 16 recorded in  $\text{CDCl}_3$

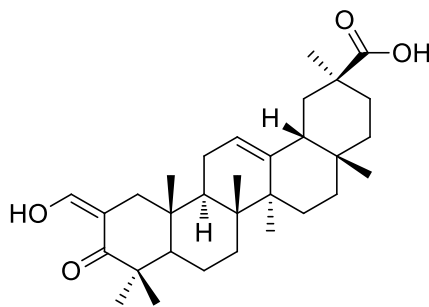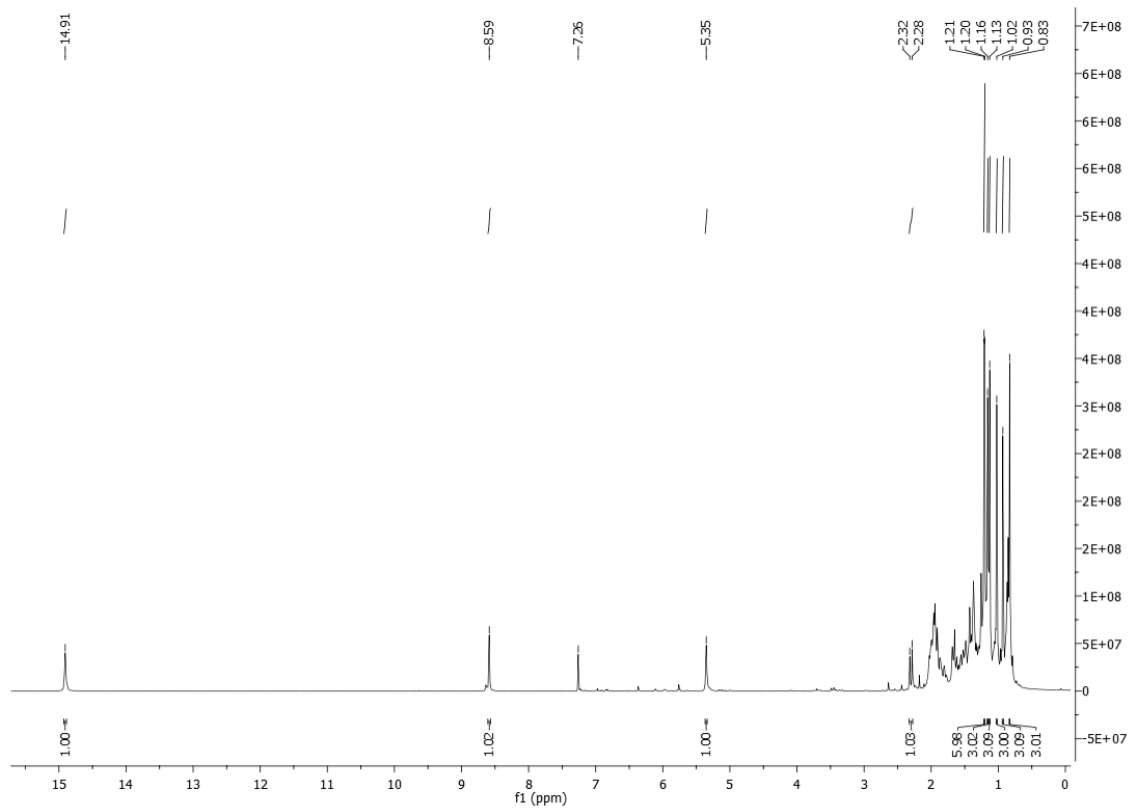

6.2.  $^{13}\text{C}$  NMR spectrum for compound 16 recorded in  $\text{CDCl}_3$

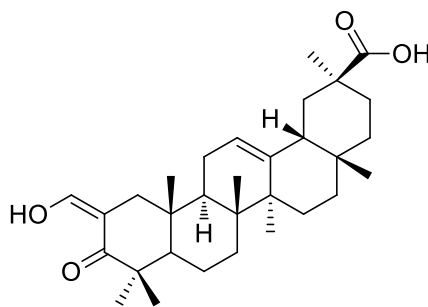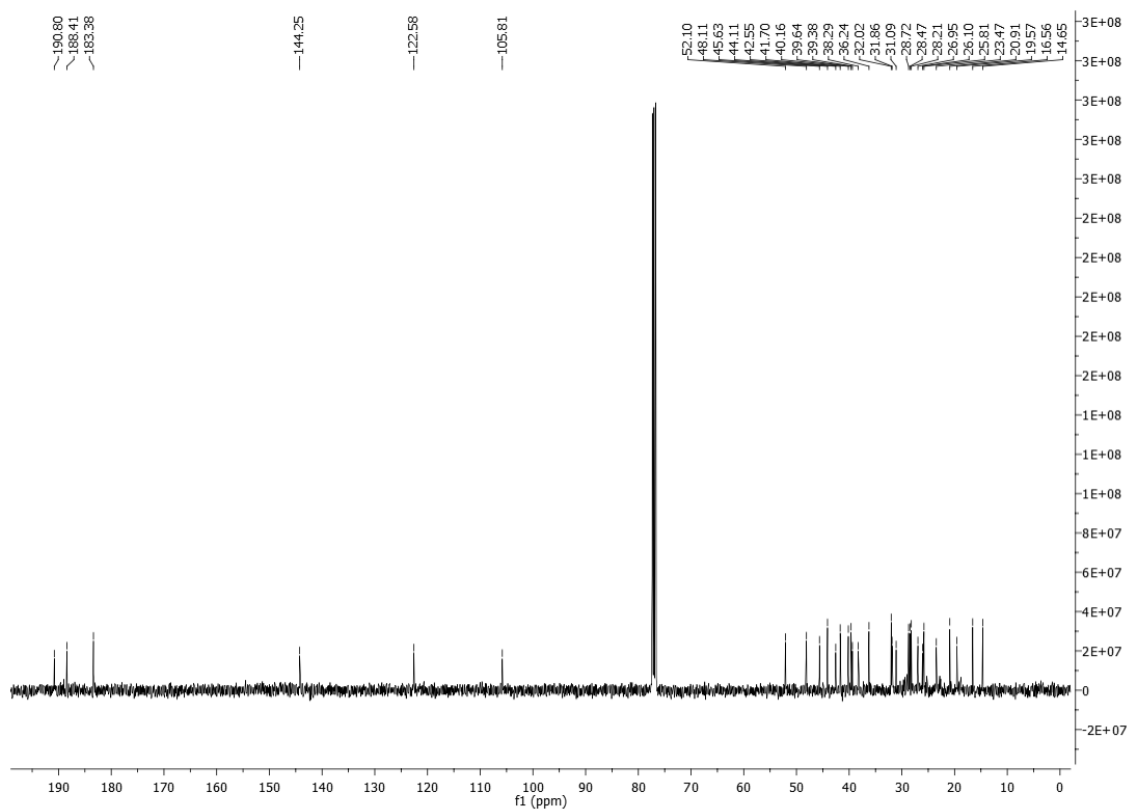

6.3. DEPT-135 spectrum for compound 16 recorded in CDCl<sub>3</sub>

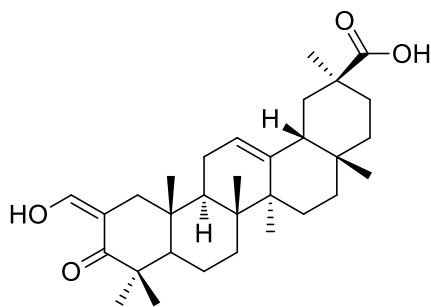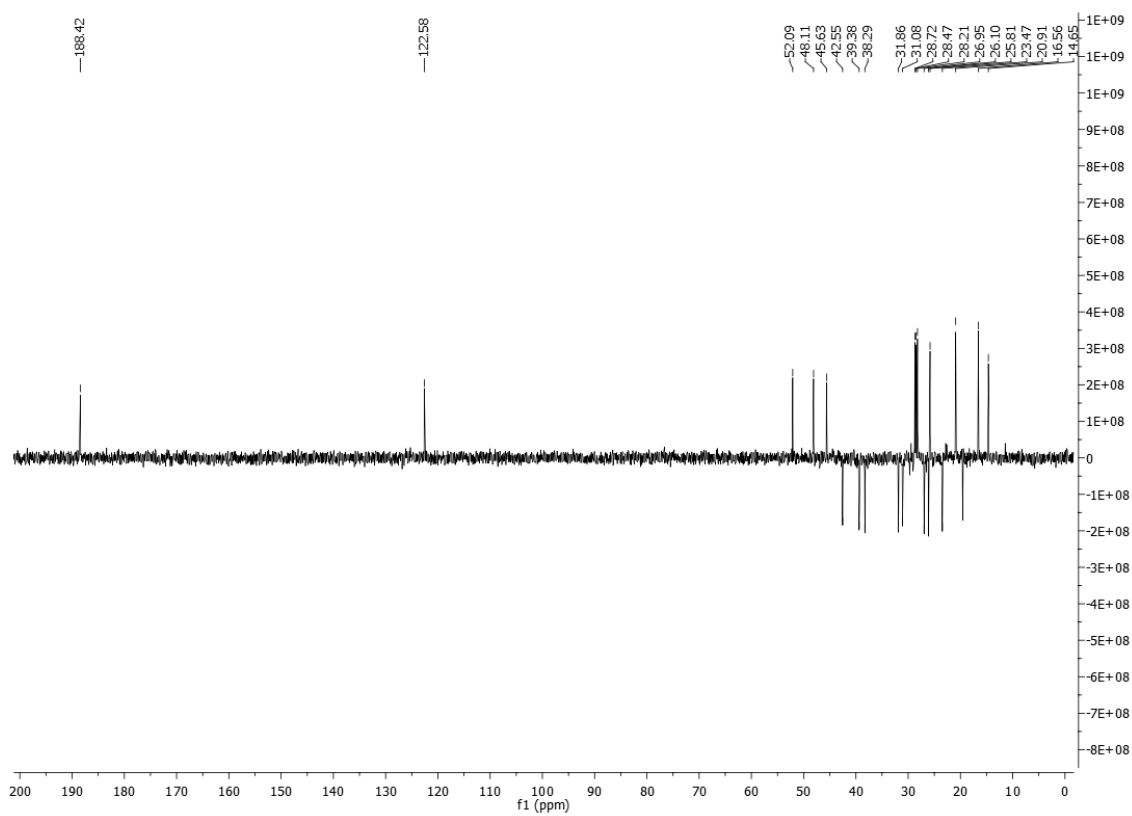

## 7. NMR data for compound 17

7.1.  $^1\text{H}$  NMR spectrum for compound 17 recorded in  $\text{CDCl}_3$

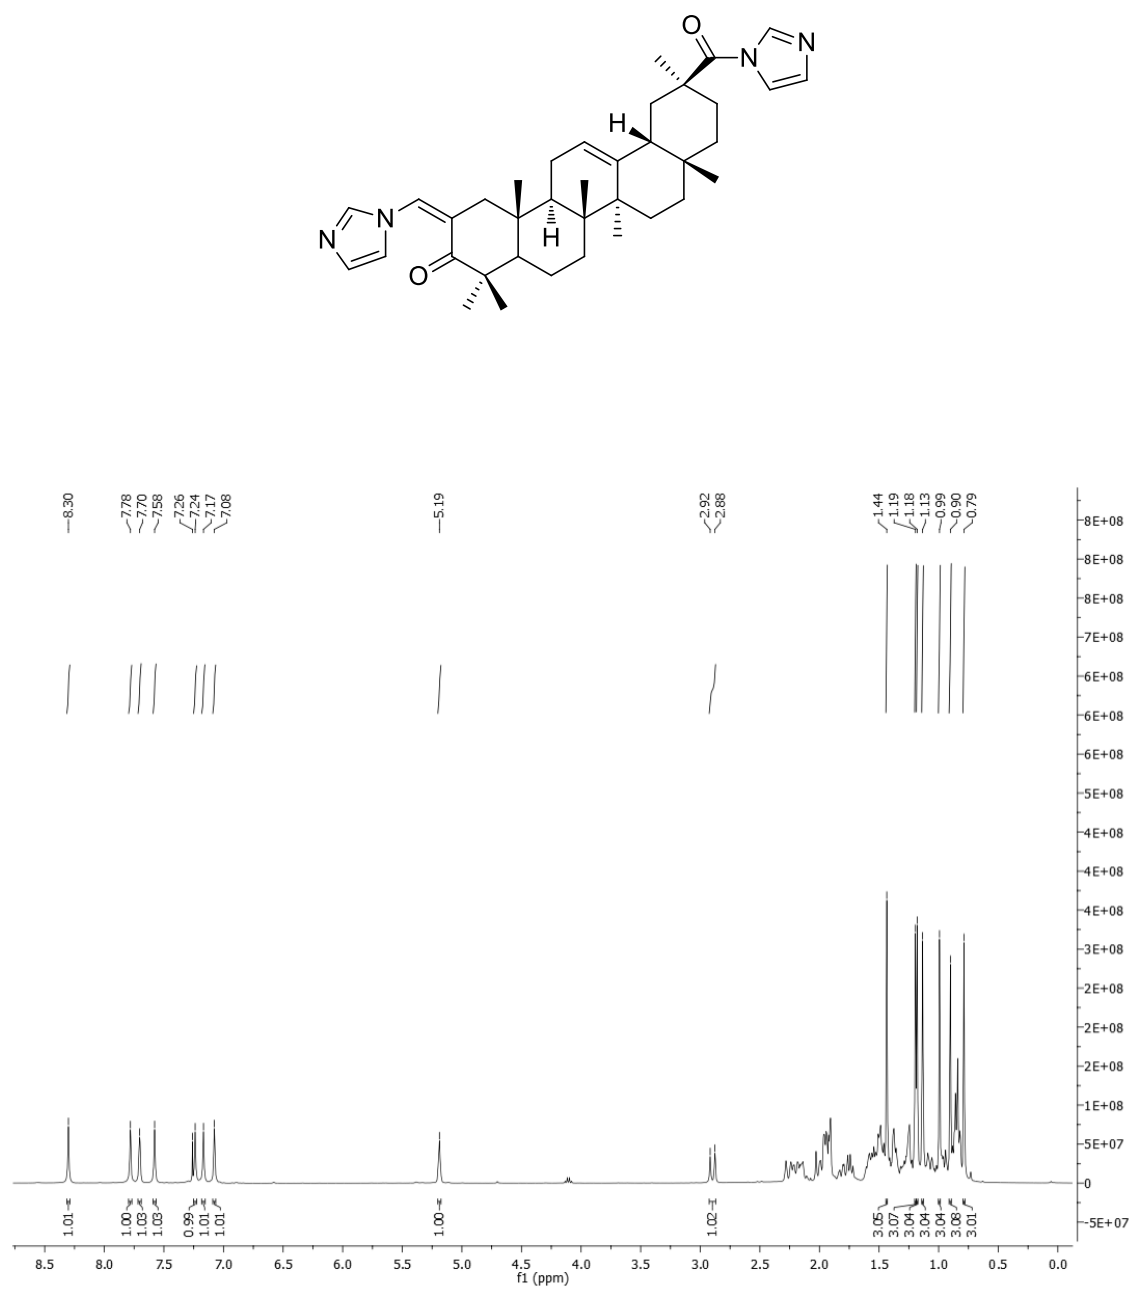



7.2.  $^{13}\text{C}$  NMR spectrum for compound 17 recorded in  $\text{CDCl}_3$

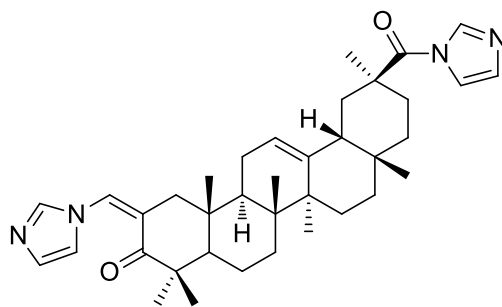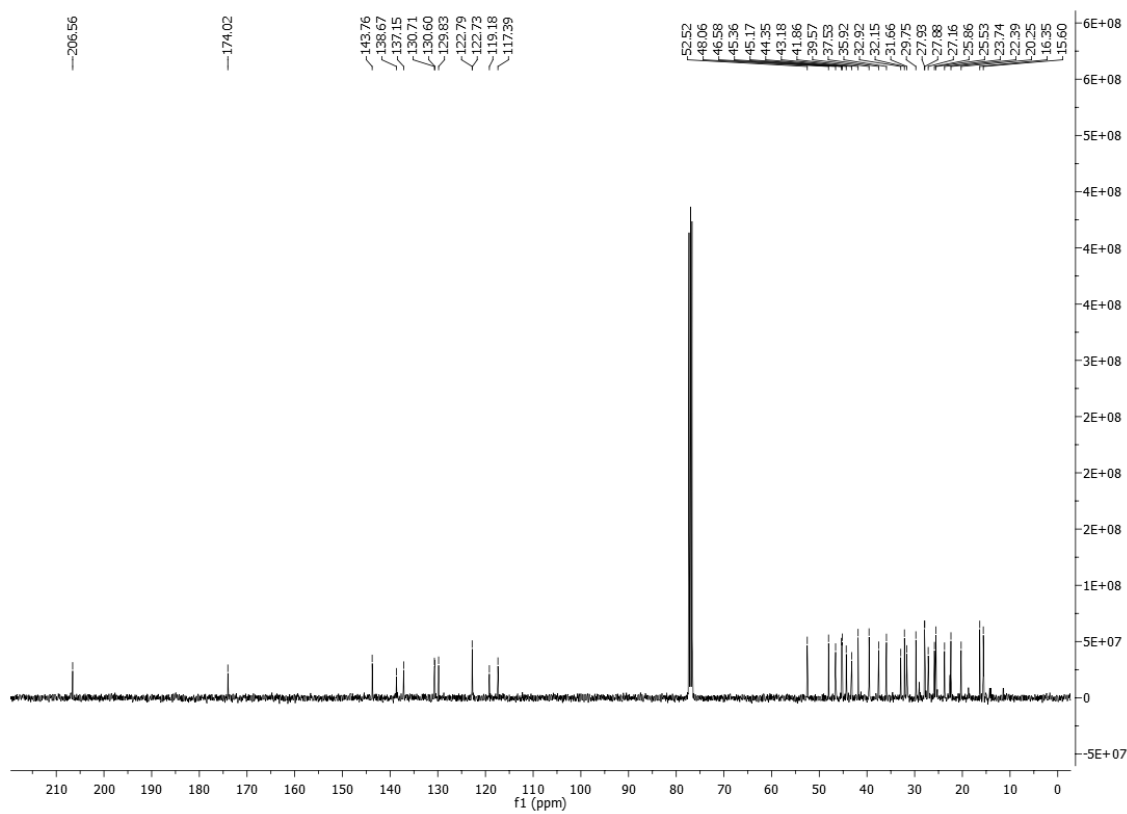

7.3. DEPT-135 spectrum for compound 17 recorded in CDCl<sub>3</sub>

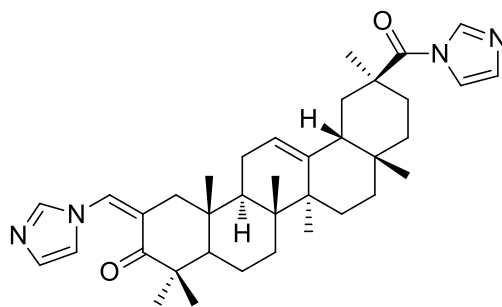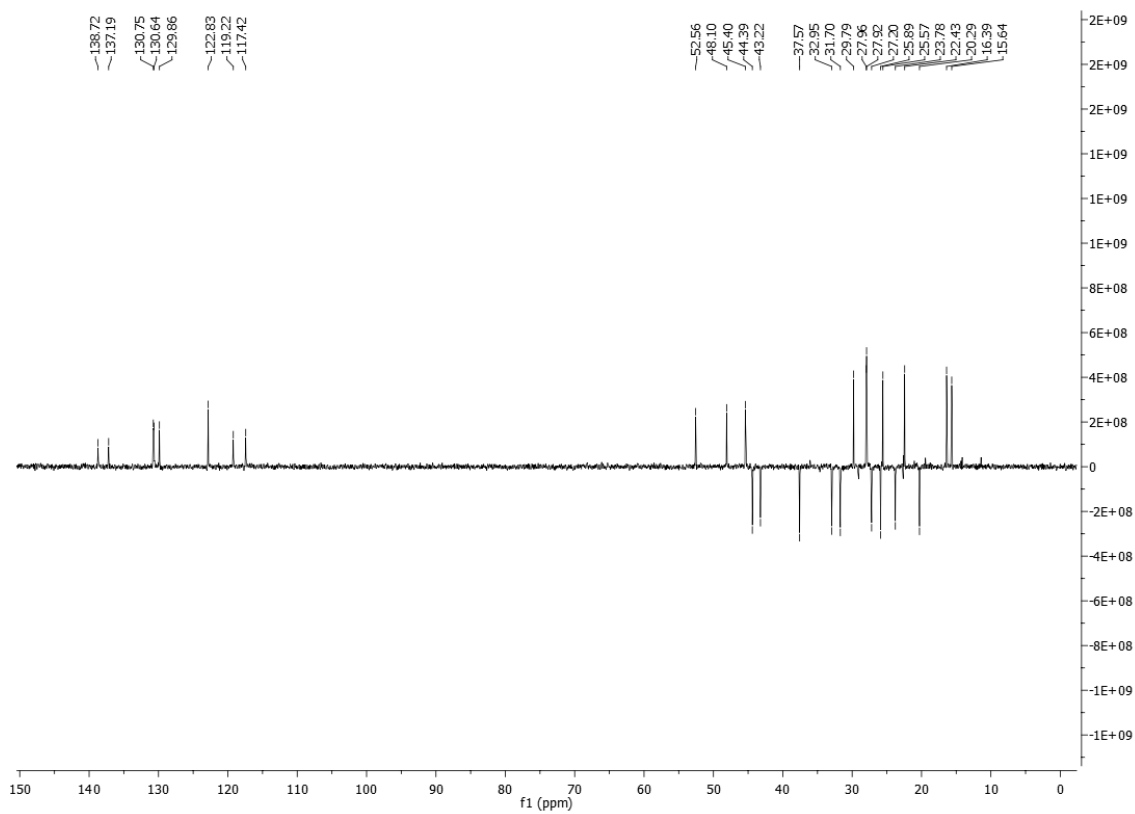

7.4. HMQC NMR spectrum for compound 17 recorded in CDCl<sub>3</sub>

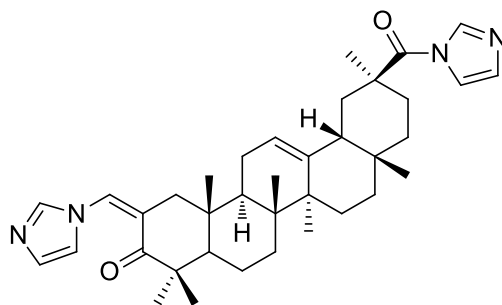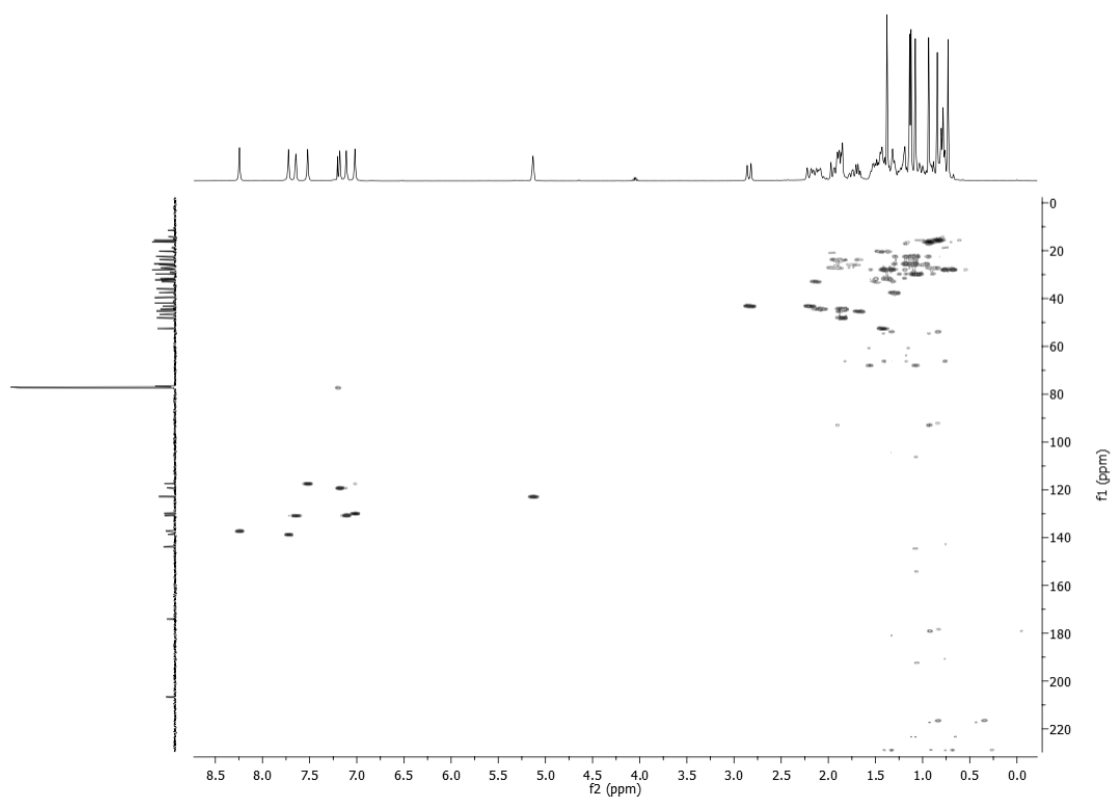

7.5. HMCB NMR spectrum for compound 17 in CDCl<sub>3</sub>

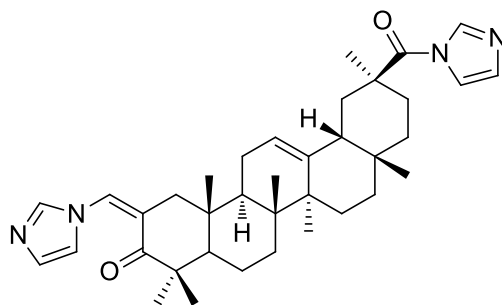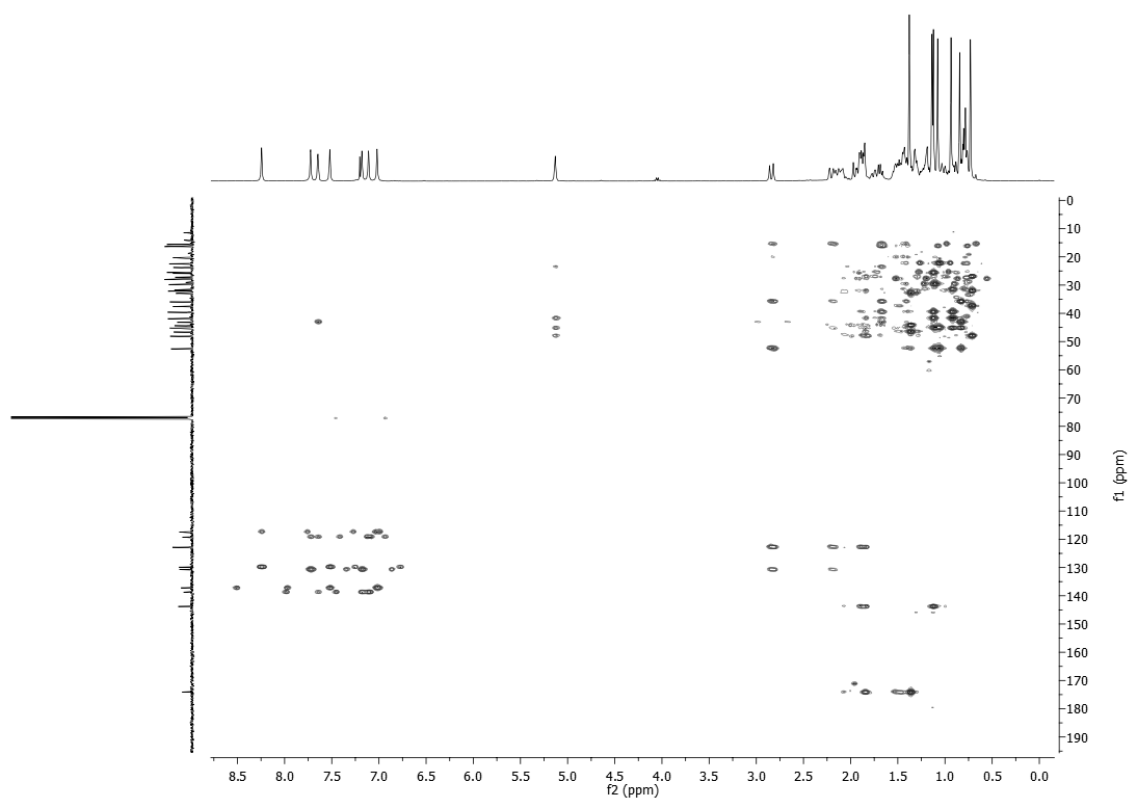

## 8. NMR data for compound 19

8.1.  $^1\text{H}$  NMR spectrum for compound 19 recorded in  $\text{CDCl}_3$

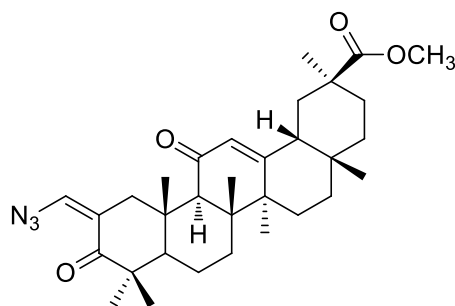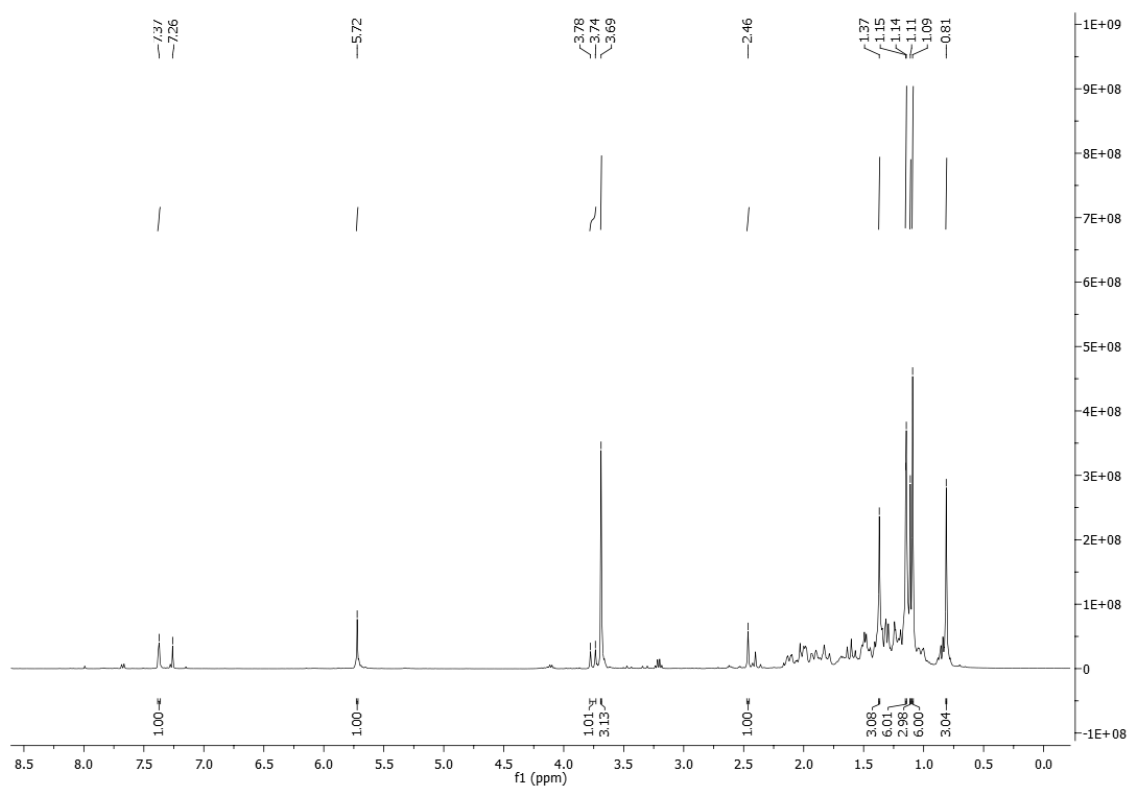

8.2.  $^{13}\text{C}$  NMR spectrum for compound 19 recorded in  $\text{CDCl}_3$

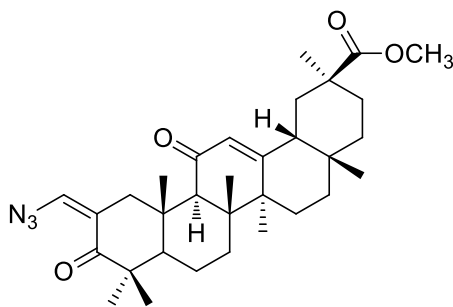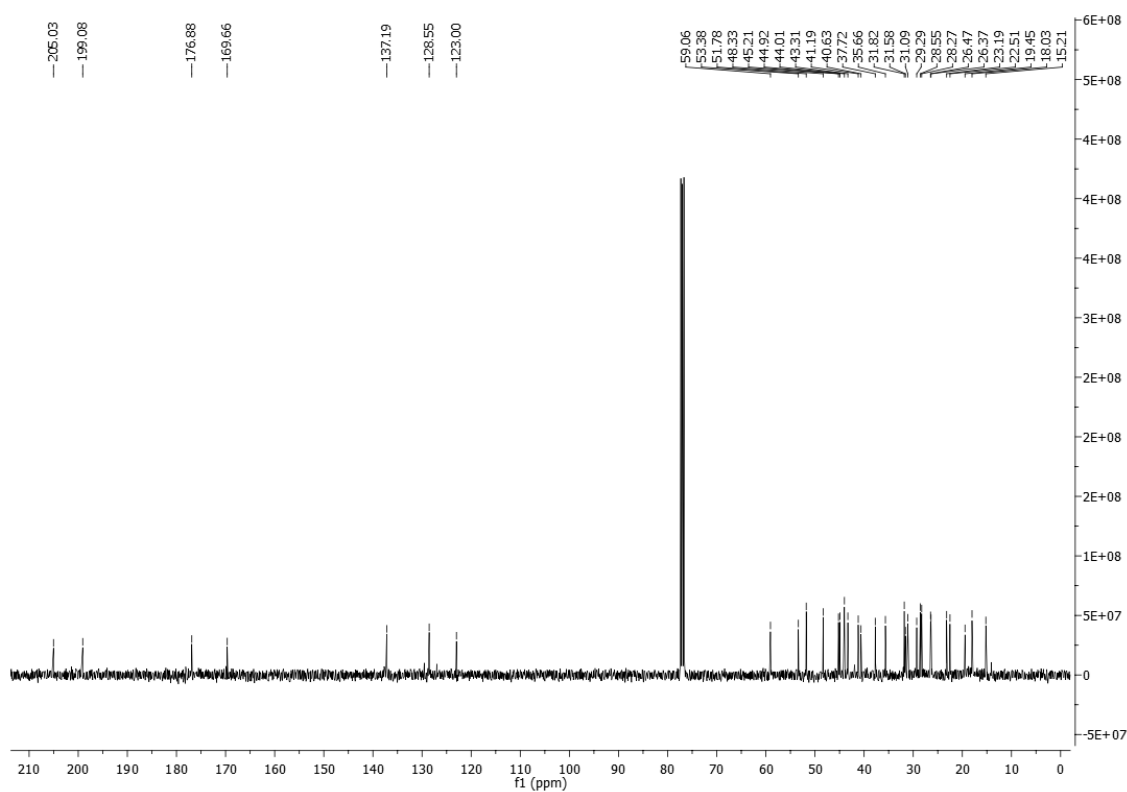

8.3. DEPT-135 spectrum for compound 19 recorded in CDCl<sub>3</sub>

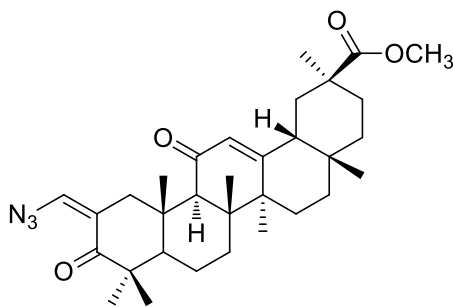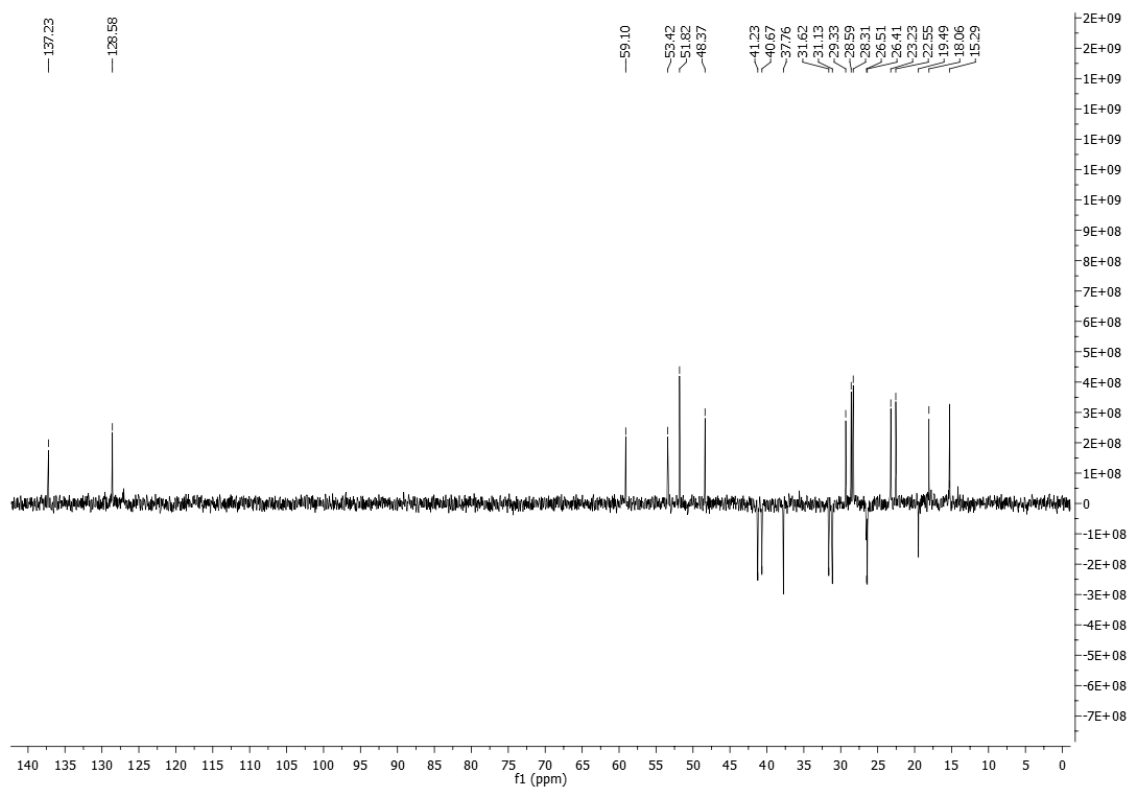

## 9. NMR data for compound 20

9.1.  $^1\text{H}$  NMR spectrum for compound 20 recorded in  $\text{CDCl}_3$

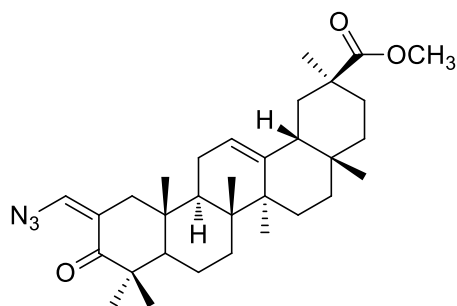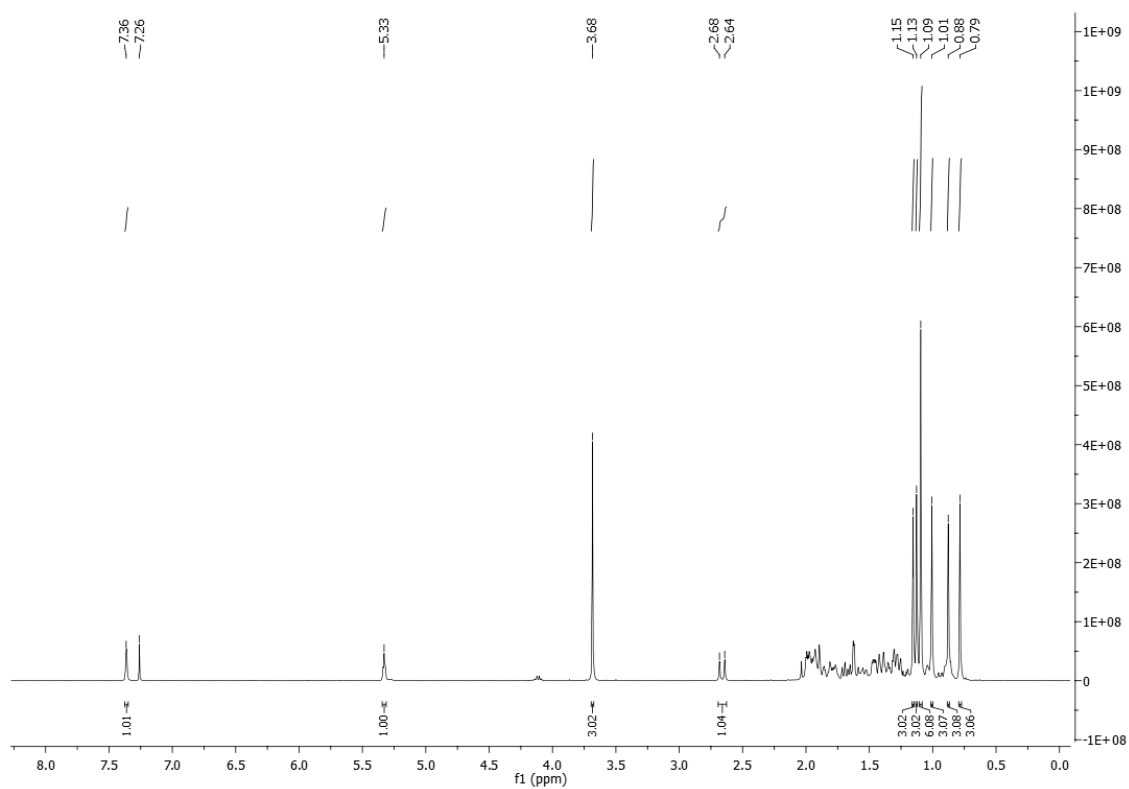



9.2.  $^{13}\text{C}$  NMR spectrum for compound 20 recorded in  $\text{CDCl}_3$

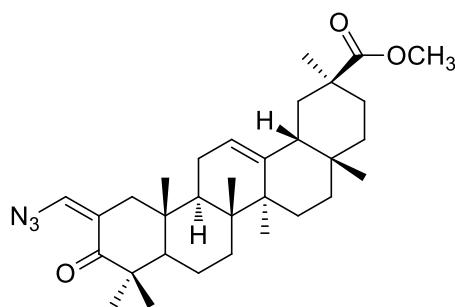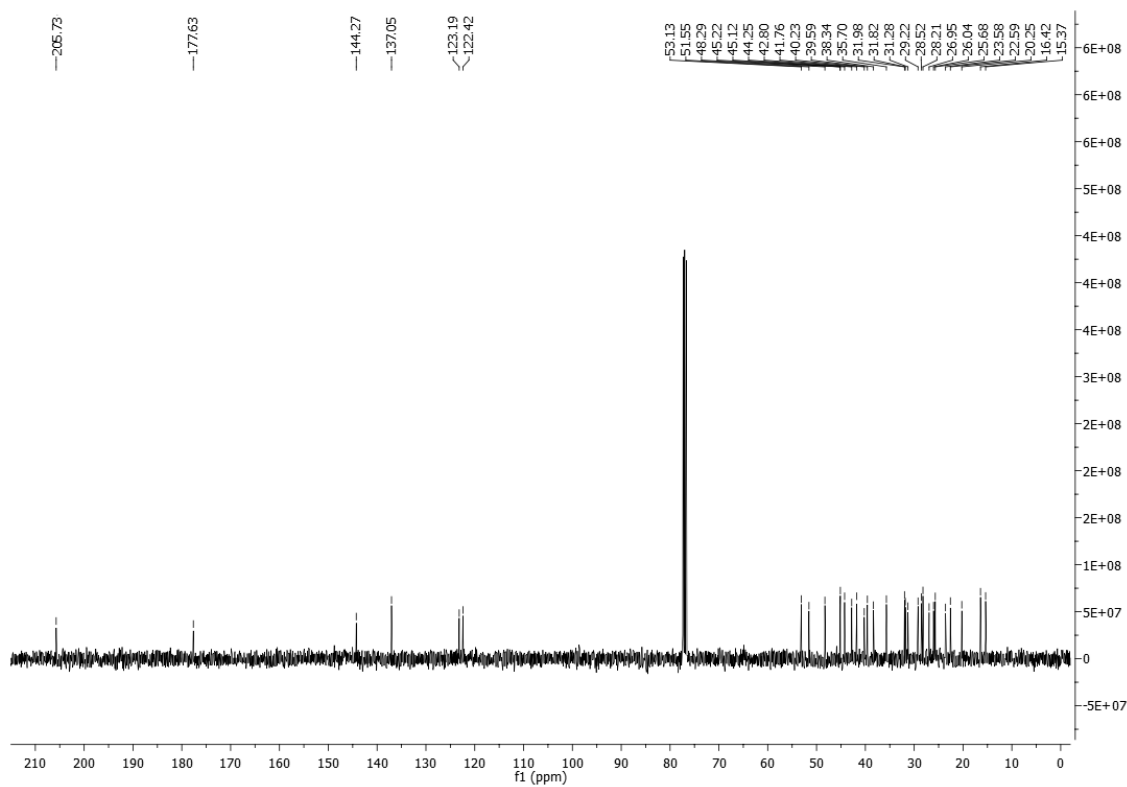

9.3. DEPT-135 spectrum for compound 20 recorded in CDCl<sub>3</sub>

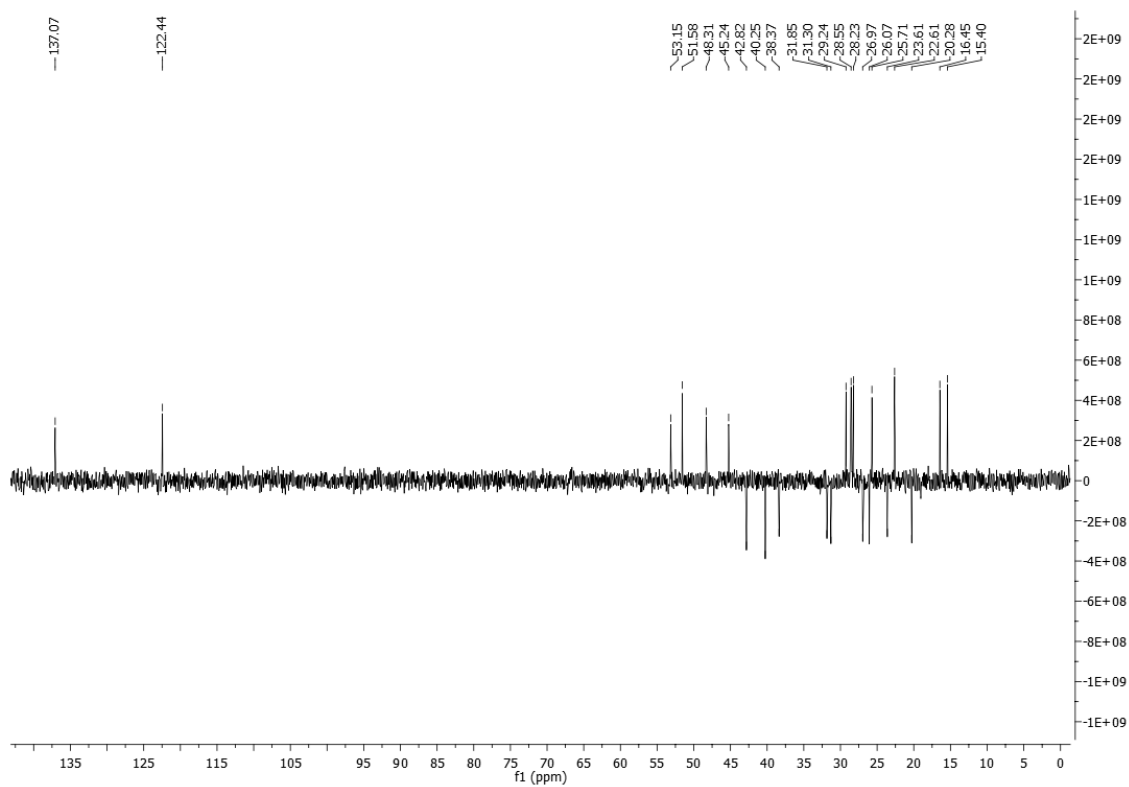

## 10. NMR data for compound 21

10.1.  $^1\text{H}$  NMR spectrum for compound 21 recorded in  $\text{CDCl}_3$

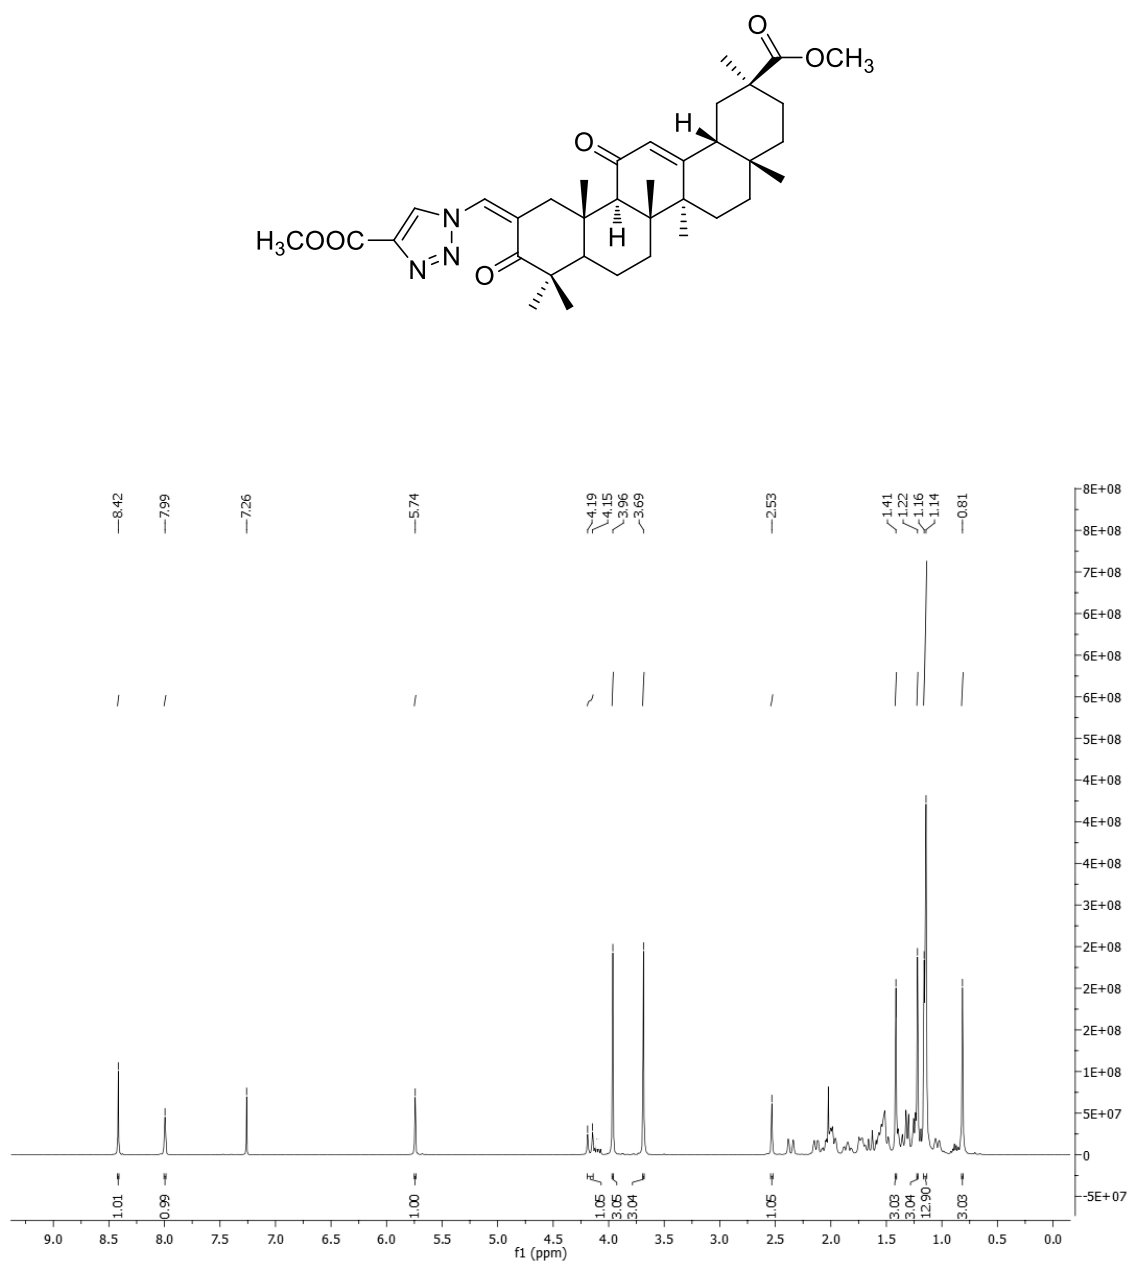

10.2.  $^{13}\text{C}$  NMR spectrum for compound 21 recorded in  $\text{CDCl}_3$

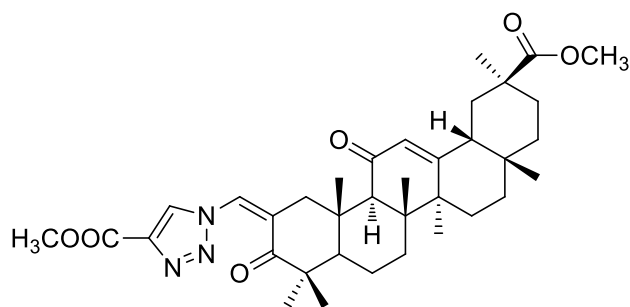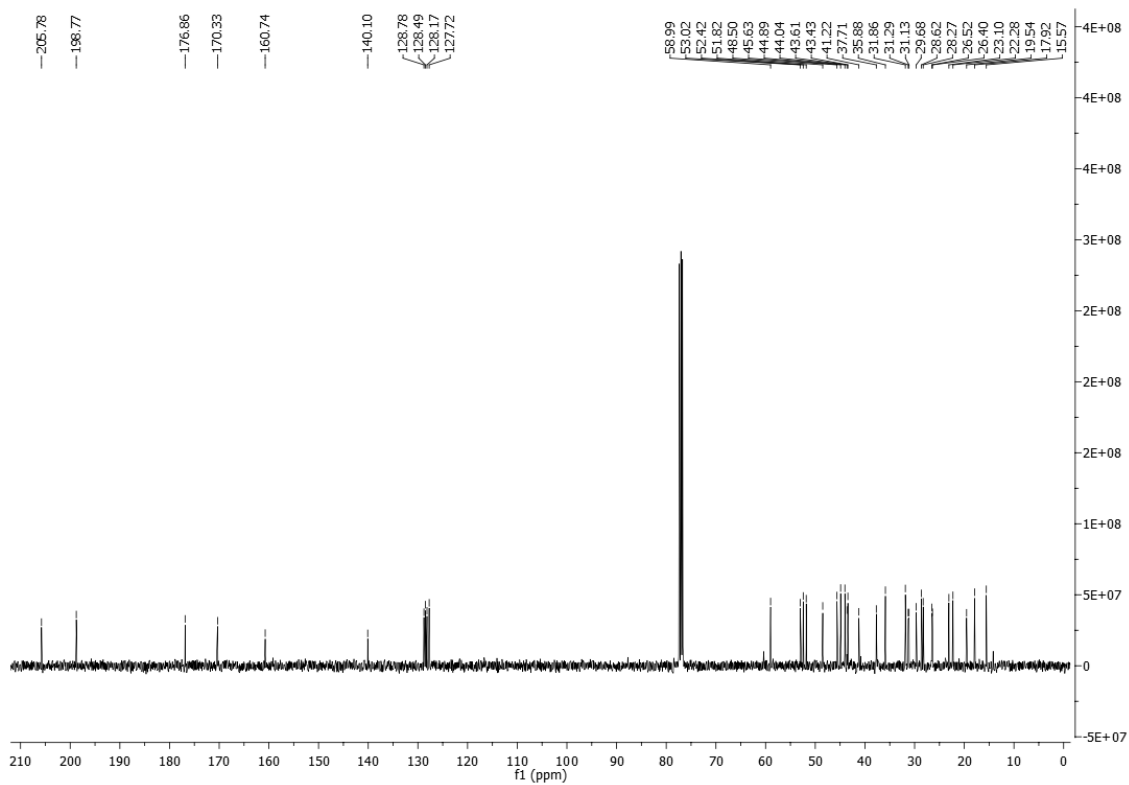

10.3. DEPT-135 spectrum for compound 21 recorded in CDCl<sub>3</sub>

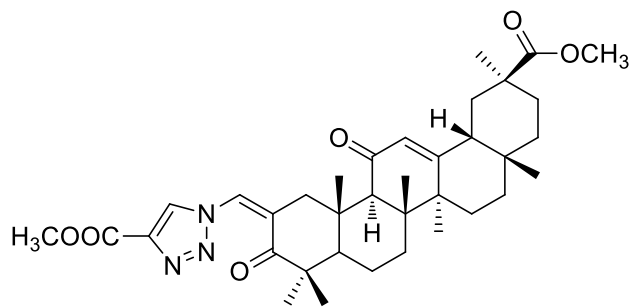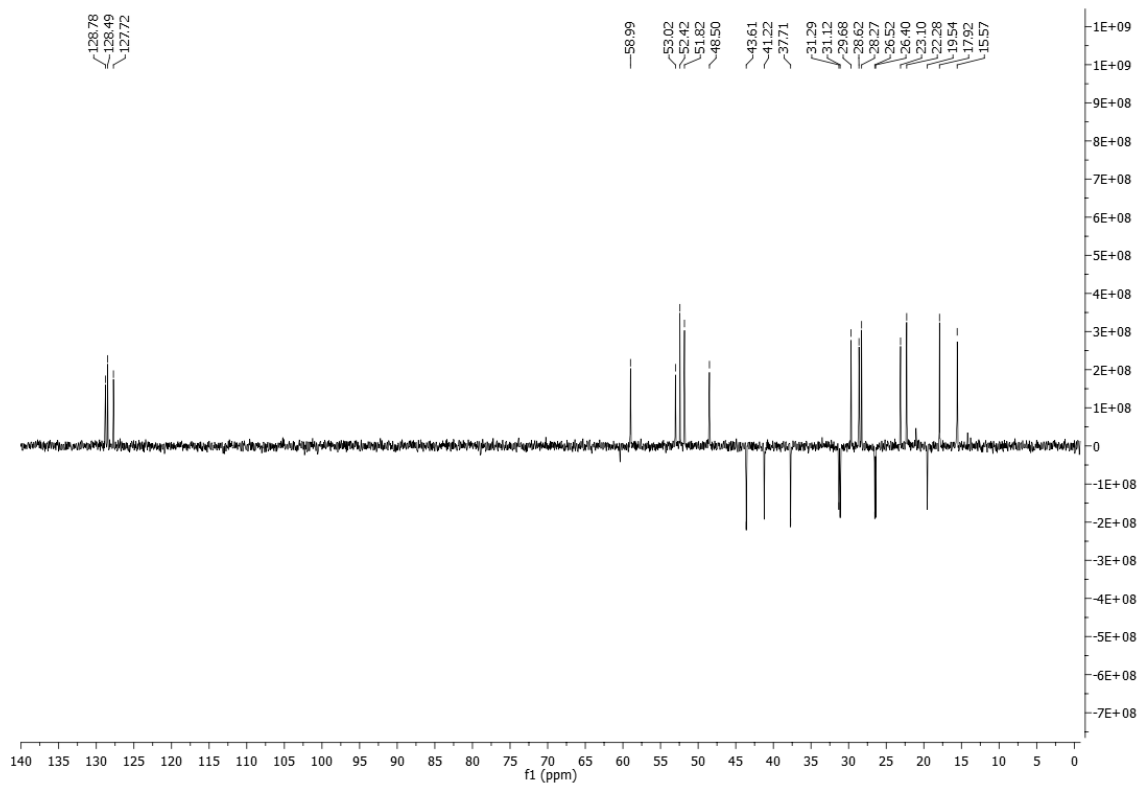

## 11. NMR data for compound 22

11.1.  $^1\text{H}$  NMR spectrum for compound 22 recorded in  $\text{CDCl}_3$

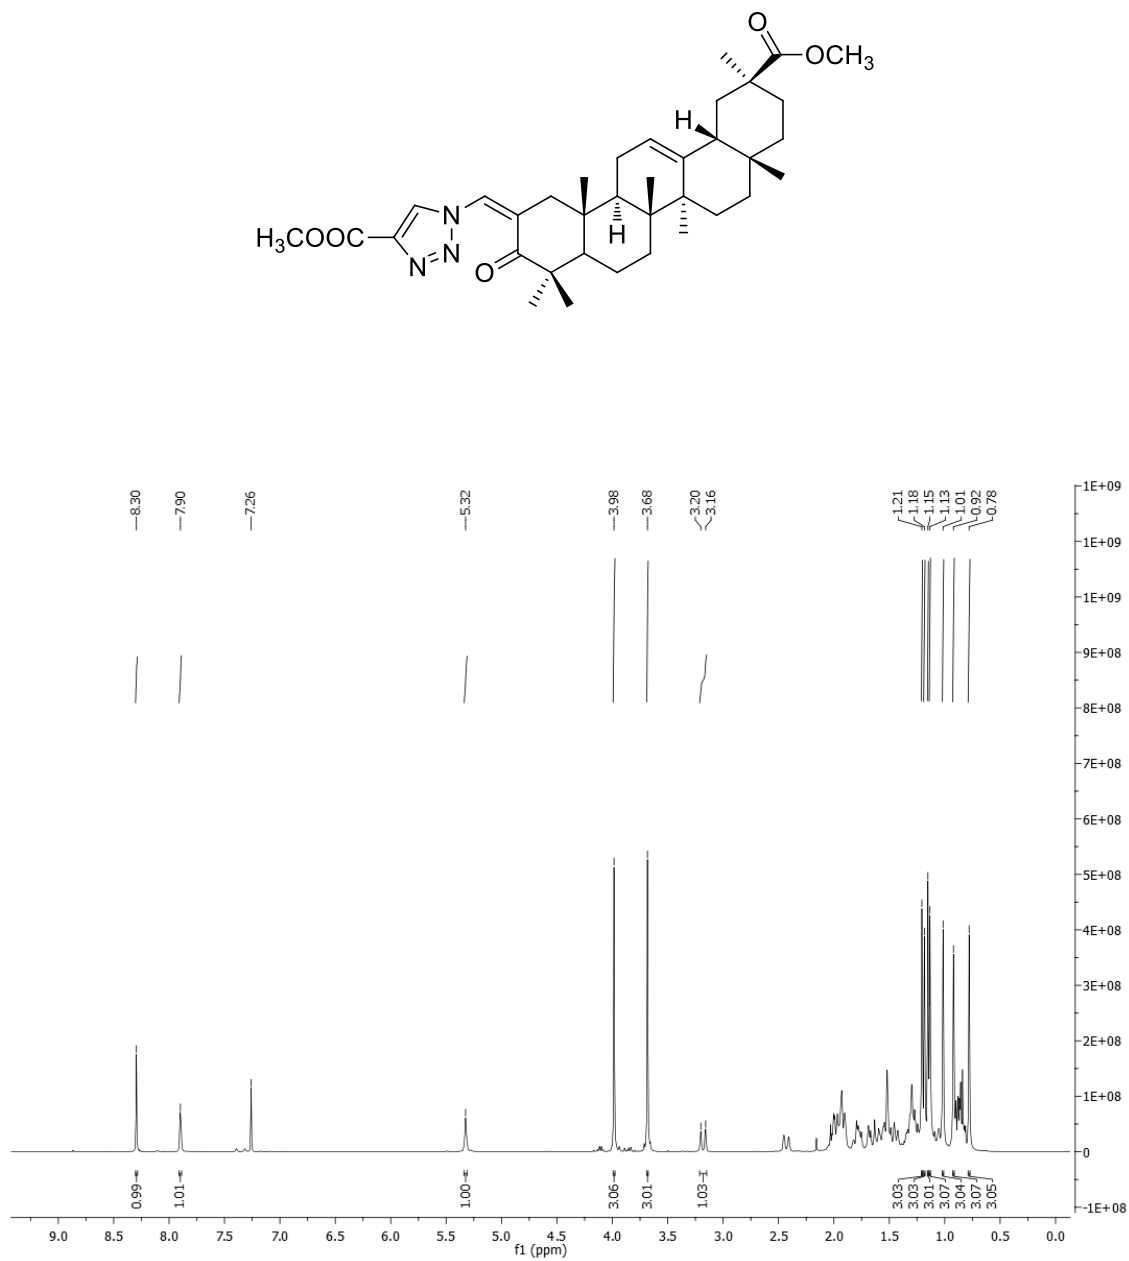

11.2.  $^{13}\text{C}$  NMR spectrum for compound 22 recorded in  $\text{CDCl}_3$

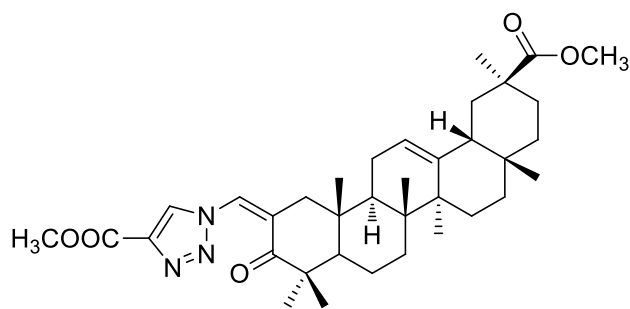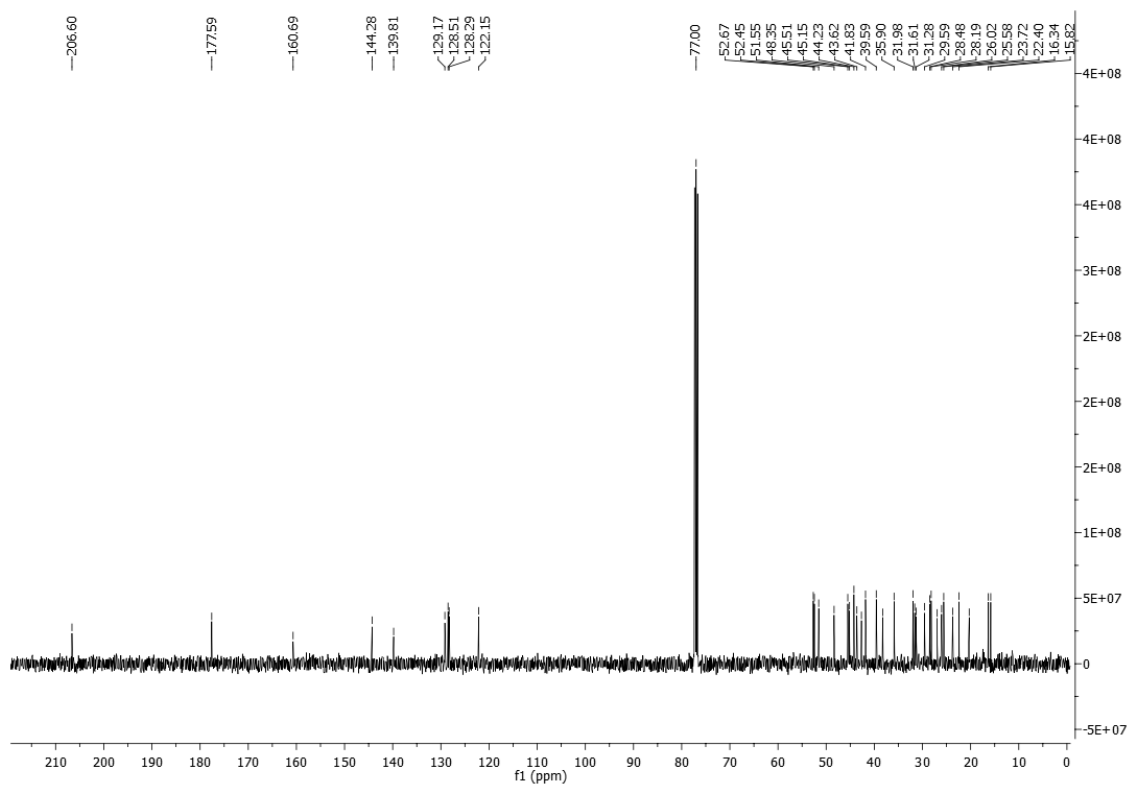

11.3. DEPT-135 spectrum for compound 22 recorded in CDCl<sub>3</sub>

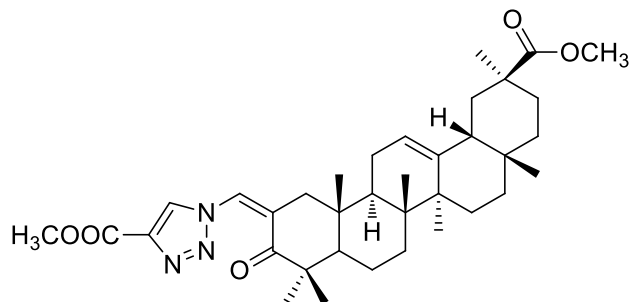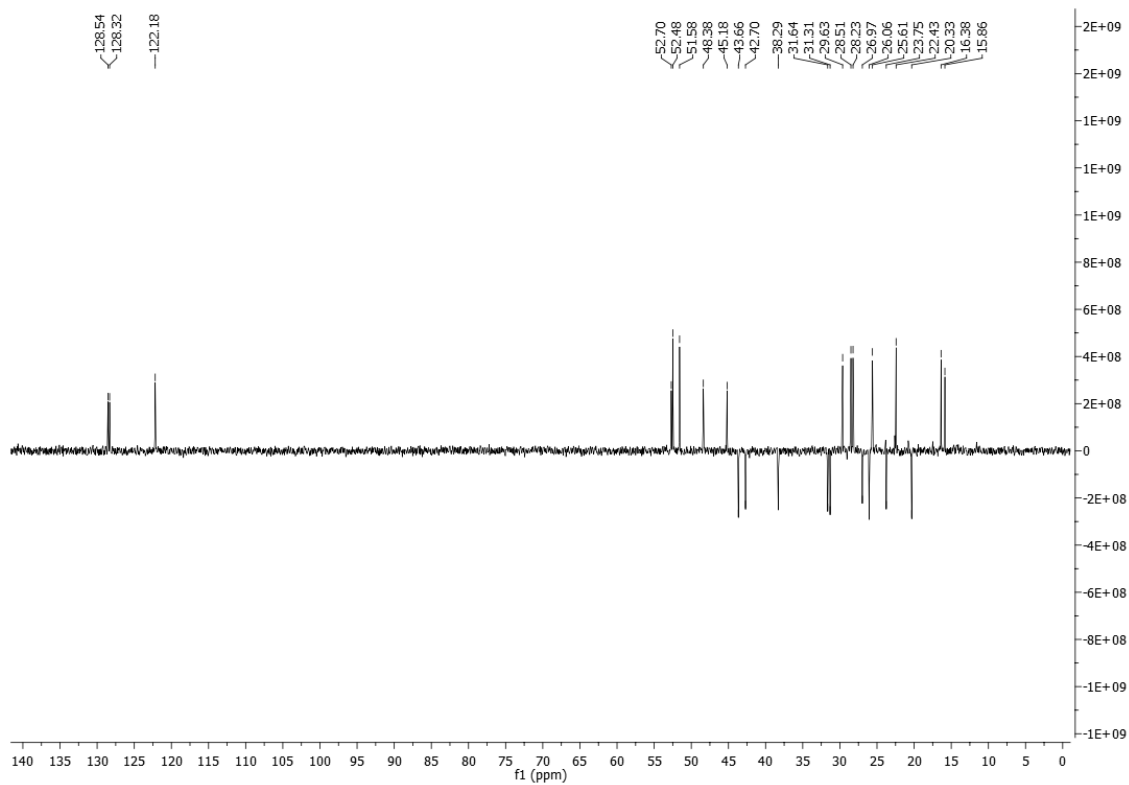



11.4. HMQC NMR spectrum for compound 22 recorded in CDCl<sub>3</sub>

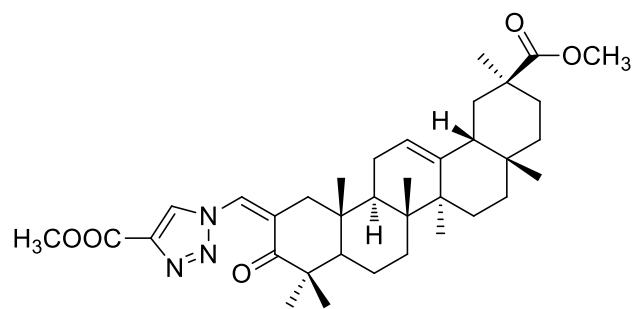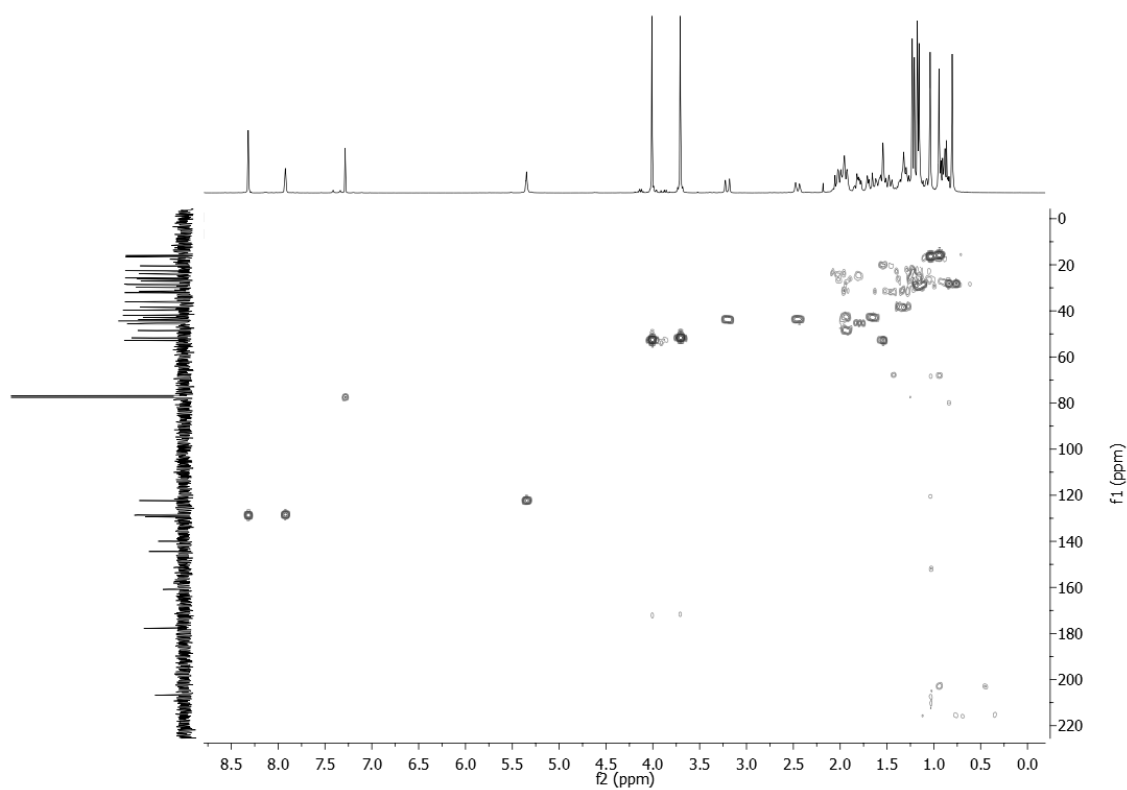

11.5. HMBC NMR spectrum for compound 22 recorded in CDCl<sub>3</sub>

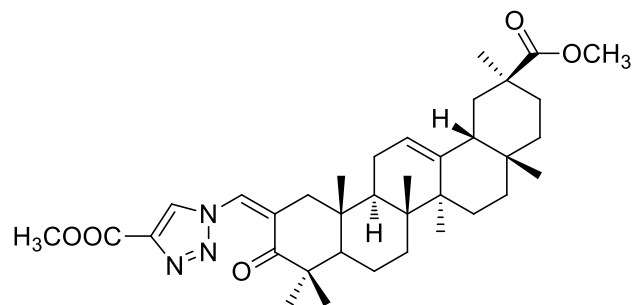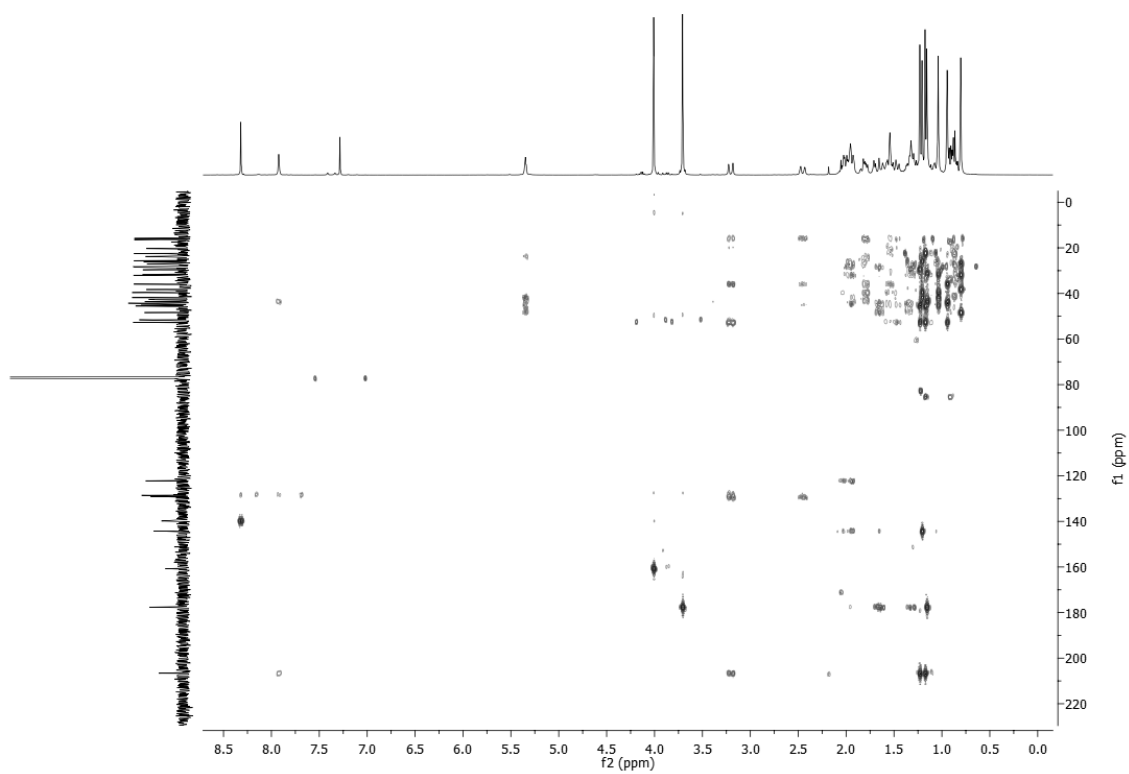

Supplement: molecules-24-00766-s001.pdf [file molecules-24-00766-s001.pdf]
